5

**Basal epidermis collective migration and local Sonic hedgehog signaling promote skeletal branching morphogenesis in zebrafish fins**

Joshua A. Braunstein<sup>1,2,#</sup>, Amy E. Robbins<sup>1,2,#</sup>, Scott Stewart<sup>1</sup>, Kryn Stankunas<sup>1,2,\*</sup>

10

15

Institute of Molecular Biology  
Department of Biology  
20 University of Oregon  
273 Onyx Bridge  
1318 Franklin Blvd  
Eugene, OR 97403-1229  
Office: (541) 346-7416  
25 Fax: (541) 346-4854

\* Correspondence: [kryn@uoregon.edu](mailto:kryn@uoregon.edu)

# Equal contributions

30 **ABSTRACT**

Adult zebrafish fins develop and robustly regenerate an elaborately branched bony ray skeleton. During caudal fin regeneration, basal epidermal-expressed Sonic hedgehog (Shh) locally promotes ray branching by partitioning pools of adjacent progenitor osteoblasts (pObs). We investigated if and how Shh signaling similarly functions during developmental ray branching.

35 As during regeneration, *shha* is uniquely expressed by basal epidermal cells (bEps) overlying pOb pools at the distal aspect of outgrowing juvenile fins. Lateral splitting of each *shha*-expressing epidermal domain followed by the pOb pools precedes overt ray branching. We use *ptch2:Kaede* fish and Kaede photoconversion to identify short stretches of *shha*<sup>+</sup> bEps and neighboring pObs as the active zone of Hh/Smoothed (Smo) signaling. Basal epidermal distal

40 collective cell migration continuously replenishes each *shha*<sup>+</sup> domain with individual cells transiently expressing and responding to Shh. In contrast, pObs have constant Hh/Smo activity. Hh/Smo inhibition using the small molecule BMS-833923 (BMS) prevents branching in all fins, paired and unpaired, with minimal effects on fin outgrowth or skeletal differentiation. Staggered addition of BMS indicates Hh/Smo signaling acts throughout the branching process. *shha*<sup>+</sup> bEps

45 and pObs are tightly juxtaposed at the site of Hh/Smo signaling, as with regenerating fins. We use live time-lapse imaging and cell tracking to find Hh/Smo signaling restrains the distal migration of bEps by apparent ‘tethering’ to pObs. We conclude short-range Shh/Smo signaling enables ray branching by re-positioning pObs during both fin development and regeneration. We propose instructive basal epidermal collective migration and Shh/Smo-promoted heterotypic cell

50 adhesion between bEps and pObs directs fin skeleton branching morphogenesis.

## INTRODUCTION

Teleost fish fins have elaborately patterned skeletons comprised of bony rays, or lepidotrichia, that shape and structurally support fin appendages. The diversity and beauty of fish fins has long captivated aquarists while serving as a compelling model to consider morphological evolution. *Danio rerio* zebrafish are widely studied ray-finned teleost fish with branched rays in all paired and unpaired fins. For example, zebrafish caudal fins typically have 18 rays of which the central 16 branch into “daughter” rays (Figure 1 Supplement 1A). Juvenile fish form primary branches around 30 days post fertilization (dpf) followed by secondary and tertiary branches. Individual rays comprise two opposed hemi-rays that form cylindrical skeletal units segmented by joints and enveloped by a multilayered epidermis (Figure 1 Supplement 1B). Teleost fins and tetrapod vertebrate limbs evolved from a common ancestral appendage (Dahn et al., 2006; Freitas et al., 2006) with rays possibly sharing deep homology with digits (Nakamura et al., 2016). The relative simplicity of the fin’s skeletal structure makes zebrafish a valuable model for understanding mechanisms of appendicular skeletal patterning.

Zebrafish fully regenerate adult fins including restoring a branched ray skeleton within two weeks of injury. Empowered by versatile genetic and other tools, zebrafish have become a leading model for appendage regeneration research. Collective studies implicate many of the same signaling pathways, including Wnt, Bmp, Fgf, and Hh, involved in tetrapod limb development (Sehring et al., 2016; Stewart et al., 2014a; Wehner et al., 2014). Therefore, zebrafish fin development and regeneration provide accessible contexts to understand how cell signaling patterns the appendicular skeleton and how the pathways are reactivated for repair. Further, zebrafish fins and their rays enable studies of fundamental developmental questions,

75 including how branched networks form – a common property of many organs including vasculature, lungs, kidneys, mammary glands, and pancreas.

Sonic hedgehog (Shh) signaling through its Smoothened (Smo) effector is one pathway dually involved in fin regeneration and appendage development. Shh is associated closely with  
80 tetrapod limb skeletal patterning (Zuniga, 2015) and Shh/Smo pathway perturbations cause syndactyly and polydactyly (Anderson et al., 2012; Malik, 2012). Shh is the Zone of Polarizing Activity (ZPA) secreted morphogen that pre-patterns the limb field into distinct skeletal units, including digits (Chiang et al., 2001; Riddle et al., 1993; Saunders & Gasseling, 1968). Zebrafish *shha* expression studies suggest a ZPA patterns pectoral and other paired fins but not unpaired  
85 fins including the caudal fin (Hadzhiev et al., 2007; Laforest et al., 1998). Nevertheless, *shha* is expressed in distal epidermal domains overlying each forming ray during caudal fin development and regeneration (Armstrong et al., 2017; Hadzhiev et al., 2007; Laforest et al., 1998; Y. Lee et al., 2009; Zhang et al., 2012). At least during regeneration, each *shha*-expressing domain splits prior to ray branching. We leveraged the highly specific Smo inhibitor BMS-833923 (BMS) to  
90 show Shh/Smo specifically promotes ray branching during zebrafish fin regeneration (Armstrong et al., 2017). However, a potential Shh/Smo role during developmental ray branching and underlying mechanisms are unresolved.

During caudal fin regeneration, distal-moving basal epidermal cells (bEps) adjacent to  
95 bony rays upregulate *shha* at the distal “progenitor zone” (Armstrong et al., 2017). Shh-expressing bEps activate Hedgehog/Smoothened (Hh/Smo) signaling in themselves and immediately adjacent progenitor osteoblasts (pObs) as marked by *patched2* (*ptch2*), which

encodes a Hh receptor and universal negative feedback regulator (Alexandre et al., 1996; Goodrich et al., 1996; Lorberbaum et al., 2016; Marigo et al., 1996). This short-range Hh/Smo signaling is required to split pOb pools and therefore ray branching without impacting proliferation or differentiation (Armstrong et al., 2017). While Hh/Smo signaling is active continuously, *shha*-expressing basal epidermal domains split laterally prior to pOb partitioning. We proposed Shh/Smo signaling might enhance physical associations between moving epidermal cells and pObs to enable the progressive partition of pOb pools (Armstrong et al., 2017).

Here, we explore the mechanisms underlying developmental fin ray branching in juvenile zebrafish. We show basal epidermal dynamics as well as Shh/Smo activity and function are largely the same as during regeneration. We use transgenic reporter lines for *shha* and its target gene *ptch2* to refine developmental expression profiles. Kaede photoconversion of *TgBAC(ptch2:Kaede)* fish reveals continuous Shh/Smo signaling in distal ray Shh<sup>+</sup> basal epidermal domains and neighboring pObs. We inhibit Shh/Smo signaling using the small molecule BMS-833923 to show the pathway is largely dedicated to ray branching in all fins, including the paired pectoral fins. Shh<sup>+</sup> bEps and pObs are closely apposed at the site of Shh/Smo signaling where a basement membrane is incompletely assembled. bEps constantly move distally, trafficking through while contributing to *shha*-expressing domains that split laterally prior to ray branching. We use live time-lapse imaging to demonstrate Shh/Smo signaling restrains basal epidermal distal migration, possibly by promoting transient adhesion of *shha*<sup>+</sup> bEps to distal ray pObs. We conclude the collective migration of bEps, constantly distal with progressive lateral domain splitting, and their atypical use of local Shh/Smo signaling re-

positions pObs for skeletal branching during both fin development and regeneration. This reflects a unique branching morphogenesis process whereby movements of a neighboring cell type – the bEps – guides the tissue-forming cells – the pObs – into split pools.

## RESULTS

### 125 **Shha expression is progressively restricted to distal ray basal epidermal domains that split preceding ray branching**

Developing fins express *sonic hedgehog a (shha)* in single basal epidermal domains adjacent to the tip of each hemi-ray up to 20 days post fertilization (dpf) (Hadzhiev et al., 2007; Laforest et al., 1998). During caudal fin regeneration, similar *shha*-positive basal epidermal domains split into distinct domains around 4 days post amputation (dpa) immediately preceding ray branching (Armstrong et al., 2017; Laforest et al., 1998; Y. Lee et al., 2009; Quint et al., 2002; Zhang et al., 2012). We expected a comparable pattern during fin development if branching during fin regeneration recapitulates developmental processes. We used the reporter line *Tg(-2.4shha:gfpABC)<sup>sb15</sup> (shha:GFP)*; (Ertzer et al., 2007; Zhang et al., 2012) to monitor *shha* expression in live zebrafish from its emergence through primary ray branching in juveniles around 30 dpf. As is well-established, *shha:GFP* expression in the caudal region was restricted to the developing floor plate and notochord through 5 dpf (Krauss et al., 1993). From 5-9 dpf, *shha:GFP* expression expanded into the caudal fin fold primordium through a ventral gap of melanophores (Figure 1A). By 9-10 dpf, *shha:GFP+* cells were enriched along emerging immature rays (Figure 1B). At 10-12 dpf, *shha:GFP* expression became specifically associated with the distal aspect of maturing central rays while remaining along the lengths of immature peripheral rays (Figure 1C). *shha:GFP* was restricted to ray tips by 14 dpa, when all rays contained maturing, segmented bone (Figure 1D).

145 The *shha:GFP* domains began splitting around 30 dpf, immediately prior to branching of the corresponding ray (Figure 1I, I', white brackets). We used whole mount immunostaining for

GFP and the basal epidermal marker Tp63 (H. Lee & Kimelman, 2002) and 3D confocal reconstructions to confirm *shha*-driven GFP was expressed exclusively in basal epidermal cells (bEps) (Figure 1K, L; expanded data in Figure 1 Supplement 2). Where Tp63-marked cells were multi-layered (magenta dashed line, Figure 1K), only the innermost cells expressed GFP. Similar *shha* expression patterns, including *shha*+ bEp domain splitting, support a common Shh/Smo-dependent mechanism for both developmental and regenerative ray branching.

### **Ptch2 expression indicates Hh/Smo activity in basal epidermis and progenitor osteoblasts**

We next assessed expression of *ptch2*, a Hh/Smo negative feedback regulator and activity marker (Alexandre et al., 1996; Goodrich et al., 1996; Lorberbaum et al., 2016; Marigo et al., 1996). Hh/Smo signaling induces *ptch2* in pObs and neighboring bEps during caudal fin regeneration (Armstrong et al., 2017; Quint et al., 2002). *ptch2* is also expressed in distal regions of late larval caudal fins, although cell-level expression is unresolved (Laforest et al., 1998). We imaged the *TgBAC(ptch2:kaede)<sup>a4596</sup>* reporter line (*ptch2:Kaede*; (Huang et al., 2012) at the same developmental time points we examined *shha:GFP*. *ptch2:Kaede* expression was confined to the notochord and floor plate until ~9 dpf (Figure 1E). By 9-10 dpf (Figure 1F), *ptch2:Kaede* was associated with nascent rays in the ventrally expanding fin primordia. At 10-12 dpf (Figure 1G), *ptch2:Kaede* was expressed the entire length of each ray. This pattern persisted through 14 dpf (Figure 1H) with notably higher *ptch2:Kaede* expression in joints and distal tip of each ray, matching its pattern in regenerating fins (Armstrong et al., 2017). As with *shha:GFP*, *ptch2:Kaede*+ domains split as ray branching initiated in 30-33 dpf juvenile fish (Figure 1J, J').



To define the cell types expressing *ptch2* during caudal fin development, we combined  
170 *ptch2:Kaede* with *Tg(runx2:mCherry)* (*runx2:mCherry*; Shannon Fisher Lab, unpublished) and  
*shha:GFP* to mark *runx2+* pObs and *shha+* bEps, respectively (Figure 1M-P and expanded data  
in Figure 1 Supplement 3). Confocal imaging of live 19 dpf double transgenic larval fish showed  
*ptch2:Kaede* co-localized with distal fin *runx2:mCherry*-expressing pObs (Figure 1M, N). Only  
adjacent and distal-extending presumptive bEps additionally expressed *ptch2:Kaede*. We used  
175 photoconversion to discern Kaede from GFP to reveal non-pOb *ptch2:Kaede* co-localized with  
*shha:GFP*-expressing bEps (Figure 1O, P). Therefore, *ptch2* defines autocrine (in bEps) and  
short-range (in pObs) Shh/Smo signaling during caudal fin development.

#### **Active Shha/Smo signaling is restricted to outgrowing distal ray regions**

180 We photoconverted distal ray ends of 25 dpf *ptch2:Kaede* caudal fins and re-imaged 24  
hours later to distinguish actively produced Kaede from perduring reporter fluorescence (Figure  
2A-C). New, unconverted Kaede was produced exclusively in short, discrete domains at the ray  
tips. Therefore, active Shh/Smo signaling appears narrowly focused in close proximity with  
*shha*-expression bEps. We also observed a stretch of photoconverted Kaede+ cells distal to the  
185 ray tips in tissue newly formed over the 24-hour post-conversion period. We observed the same  
pattern during fin regeneration, suggestive of distal migration of previously Shh/Smo-responsive  
bEps that ceased *ptch2* expression when moving beyond the Shh/Smo active zone (Armstrong et  
al., 2017).

190 We used the potent Smo inhibitor BMS-833923 (henceforth abbreviated BMS)  
(Armstrong et al., 2017; Lin & Matsui, 2012) to confirm *ptch2:Kaede* reports Shh/Smo activity

during fin development. As expected, caudal fins of 25 dpf fish treated with 1.25  $\mu$ M BMS and photoconverted 3 hours later produced no new Kaede 24 hours post-conversion (hpc; Figure 2 Supplement 1G-L,  $n=8/8$ ). Curiously, we no longer observed distally displaced photoconverted Kaede+ bEps and the remaining photoconverted Kaede had weakened since conversion (Figure 2 Supplement 1H, I, K, L). We surmise the 24-hour Shh/Smo-inhibition caused Kaede+ bEps to shed prematurely from the fin and therefore only photoconverted Kaede+ pObs remained. Therefore, Shh/Smo signaling may retard distal bEp collective movements.

## 200 **Sustained Shh/Smo signaling promotes ray branching during fin development**

We next investigated if Shh/Smo is required for ray branching during fin development as during regeneration (Armstrong et al., 2017). *Tg(sp7:EGFP)<sup>b1212</sup>* osteoblast reporter fish (*sp7:EGFP*; DeLaurier et al., 2010) treated with 0.63  $\mu$ M BMS from 25 to 42 dpf failed to branch their caudal fin rays (Figure 3A-D,  $n=5$  per BMS and DMSO control groups). In contrast, Shh/Smo-inhibition did not disrupt caudal fin outgrowth or skeletal maturation of the central 16 rays (Figure 3 Supplement 1). Curiously, the non-branching principal peripheral rays uniquely were shorter in BMS-treated fish (Figure 3A, C white arrows and Figure 3 Supplement 1). BMS-treatment of 29 dpf *shha:GFP* fish exposed to EdU for 12 hours did not change the fraction of EdU+ intra-ray cells, i.e. pObs and mesenchyme nestled between the epidermal Shh domains of each hemi-ray (Figure 3 Supplement 2,  $n=5$  per group). We conclude Shh/Smo signaling is largely dedicated to ray branching with minimal proliferation or bone maturation effects during both fin development and, as shown previously, regeneration (Armstrong et al., 2017).

Shh/Smo signaling may act transiently to initiate ray branching or continuously during  
215 the branching process. To distinguish between these possibilities, we staggered the start of BMS  
treatment to “before”, “during”, or “after” branching (Figure 3E), identified by *a priori* screening  
24-35 dpf *sp7:EGFP* clutchmate fish. Expectedly, BMS-exposure initiated prior to ray branching  
prevented said rays from branching (“before” group, Figure 3F, G, G’,  $n=4/4$ ) and rays that had  
already fully branched remained so after BMS treatment (“after” group, J, K, K’,  $n=4/4$ ).  
220 However, rays that recently initiated branching (“during” group, Figure 3H) re-fused upon BMS  
exposure, forming “gapped” ray segments (Figure 3I, I’,  $n=4/5$ ). Therefore, sustained Shh  
signaling acts throughout ray branching morphogenesis rather than as a switch that initiates  
branching.

### 225 **Shh/Smo signaling does not substantially contribute to initial fin ray patterning**

*shha* and *ptch2* expression during the initial stages of ray formation (Figure 1B, E)  
suggest Shh/Smo influences early fin skeletal patterning in addition to promoting later, juvenile-  
stage ray branching. To explore this possibility, we inhibited Shh/Smo signaling from as early as  
2 dpf, when the larval fin fold entirely comprises soft tissue absent of any ray structures. As  
230 expected, *ptch2:Kaede*-marked Shh/Smo signaling was restricted to the notochord and floor plate  
(Figure 3 Supplement 3A-C). Photoconversion experiments confirmed BMS fully inhibited  
production of new *ptch2:Kaede* in 14 dpf larval caudal fins (Figure 3 Supplement 3D-E’, total  
 $n=33-44$  per group), as with embryos, juvenile fins, and regenerating adult fins (Figure 2  
Supplement 1G-L; (Armstrong et al., 2017). We treated *sp7:EGFP;runx2:mCherry* fish with  
235 1.25  $\mu$ M BMS from 2 until 14 dpf, when all 18 rays were clearly established. Their caudal fins  
developed the correct complement of 18 rays, each which largely maintained position, dorsal-

ventral pattern, and identity (Figure 3 Supplement 3F-G'). As such, Shh/Smo may have only minor or no roles in initial caudal fin skeletal patterning.

#### 240 **Shh/Smo signaling promotes ray branching in all fins**

Zebrafish have 3 unpaired (dorsal, anal, and caudal) and 4 paired (pectoral and pelvic) fins, all which have a branched dermoskeleton. We tested if Shh/Smo signaling promotes ray branching in all seven fins by treating *shha:GFP;runx2:mCherry* fish with BMS starting at 21 dpf, prior to asynchronous ray branching across fins. Both DMSO control and BMS-treated fish  
245 showed *shha:GFP*<sup>+</sup> domains at the distal end of every ray of all fins at 42 dpf (Figure 4). However, BMS-treated fish showed no or, at best, severely delayed and sporadic branching in all fins (*n*=6 per group). Therefore, all fins employ a common Shh/Smo signaling-dependent mechanism for ray branching regardless of evolutionary or morphological divergence.

#### 250 **Shha+ bEps and pObs are intimately associated in developing caudal fins**

We next aimed to identify how sustained, local Shh/Smo signaling affects bEp and/or pOb cell behaviors to promote ray branching morphogenesis. The close proximity of these two Shh-responsive cell types suggested their movements might be physically coupled in a Shh/Smo-dependent manner to promote branching. To assess potential physical contacts between bEps and  
255 pObs, we first stained longitudinal sections of 32 dpf juvenile fin rays from *shha:GFP* fish with GFP, the osteoblast marker *Zns-5*, and Laminin, a component of the epidermal-osteoblast separating basement membrane. As expected, *Shha:GFP*<sup>+</sup> bEps were directly adjacent to pObs (Figure 5 Supplement 1). A thin Laminin-containing basement membrane separated pObs and the proximal-most *Shha:GFP*<sup>+</sup> bEps that had recently arrived in the active zone and initiated

260 *shha* expression. More distally, the double staining for *Shha:GFP*<sup>+</sup> bEps and *Zns-5*<sup>+</sup> pObs produced even partially overlapping signal (Figure 5 Supplement 1D and D'), suggesting the two cell types are intimately associated. Here, the laminin<sup>+</sup> basement membrane was less dense and sometimes fragmented, likely reflecting its nascent production (asterisks, D').

265 We further explored the relative positioning of bEps and pObs at the onset of ray branching by 3D confocal reconstructions of live imaged fins of 28 dpf *shha:GFP;runx2:mCherry* fish (Figure 5A-C). *shha:GFP*<sup>+</sup> bEps and *runx2:mCherry*<sup>+</sup> pObs were tightly juxtaposed in both hemi-rays of a single lepidotrichia (Figure 5 Movie 1). Focusing on one hemi-ray, we observed extensive apparent heterotypic surface contacts, including areas  
270 where *shha:GFP*<sup>+</sup> bEps enshrouded a ridge of pObs (Figure 5 Movie 2). Single sagittal optical slices and reconstructed slice equivalents examined multi-dimensionally (Figure 5D-F) showed intertwined bEps and pObs unresolvable by conventional confocal microscopy.

We considered if Shh/Smo signaling promotes the close juxtaposition of bEps and pObs.  
275 However, BMS treatment of *shha:GFP;runx2:mCherry* fish from 24-34 dpf did not alter the intimate association between *Shh*<sup>+</sup> bEps and *Runx2*<sup>+</sup> pObs in static images of live fins even though the same drug exposure prevented ray branching to 42 dpf (Figure 5 Supplement 2). As expected, *Runx2*<sup>+</sup> pOb pools failed to split upon BMS exposure. Interestingly, the *shha:GFP* domains of BMS-treated fish variably remained as one cluster per hemi-ray (Figure 5  
280 Supplement 2E, J; 4/10 split, 6/10 un-split for dorsal ray 3). In contrast, our fin regeneration study indicated *Shha*-domain splitting is always Shh/Smo independent (Armstrong et al., 2017). We speculate Shh/Smo signaling has an ancillary role in epidermal domain branching that is less

apparent in larger rays, including of adult fins. Regardless, Shh/Smo signaling does not support ray branching by promoting close proximity between bEps and pObs per se.

285

### **Shh/Smo signaling restrains basal epidermal collective movements while adjacent to pObs**

Shh/Smo inhibition appeared to increase the rate of bEp shedding due to accelerated distal collective movements (Figure 2 Supplement 1I, L). Therefore, we considered if Shh/Smo promotes transient adhesion (direct or indirect) between bEps and pObs that impedes bEp movements while they neighbor relatively stable pObs. Such regulated heterotypic adhesion, which may not be evident by static imaging, coupled with force-generating bEp collective movements during *shha*<sup>+</sup> domain splitting, could re-position pOb pools over time. We time-lapse imaged caudal fins of *ptch2:Kaede* fish at late larval stages (22-24 dpf) to assess heterotypic cellular dynamics in outgrowing rays. *ptch2:Kaede*<sup>+</sup> bEps moved distally over *ptch2:Kaede*<sup>+</sup> pObs, which remained stationary over the 30 minute imaging period, and in more distal fin tissue (Figure 6 Movie 1, Figure 6 Supplement 1A-C). We used semi-automated tracking of individual *ptch2:Kaede*<sup>+</sup> bEps to determine *ptch2:Kaede*<sup>+</sup> bEps of BMS treated fish moved significantly faster (3-6 cells per fish and *n*=8 fish per group) (Figure 6 Supplement 1D). Therefore, Shh/Smo signaling restrains the distal movement of Shh/Smo-responsive bEps.

300

We imaged caudal fins of *shha:GFP;runx2:mCherry* larval fish with and without Shh/Smo inhibition to monitor movement dynamics of *shha:GFP*-expressing bEps relative to Runx2<sup>+</sup> pObs (representative fish in Figure 6A-D' and Figure 6 Movie 2; all fish shown in Figure 6 Supplement 2). We resolved individual cells at higher detail in distal ray regions by capturing full confocal z-stacks every 2 minutes over 30 minutes. Assisted by semi-automated

305

cell tracking, we noted bEps moved faster when beyond the field of pObs in DMSO-treated control fins. We observed slow moving bEps in contact with pObs before detaching and rapidly moving distally. In contrast, BMS exposure caused rapid distal bEp movement irrespective of proximal-to-distal position or proximity to pObs.

310

We quantified positional dynamics of individual bEps and plotted their average normalized speed compared to starting position relative to the end of ray-forming Runx2+ pObs (DMSO:  $n=5$  fish, 26-38 cells per fish, total of 159 cells; BMS:  $n=4$  fish, 26-41 cells per fish, total of 135 cells). *shha:GFP*-expressing bEps located distal to pObs moved faster than pOb-associated bEps in control animals, producing a clear upward velocity shift at the pOb border (Figure 6E). In contrast, BMS treatment caused evenly distributed bEp velocities before and after the pOb-containing region. Taken together, we propose local Shh/Smo signaling enhances heterotypic cell adhesion that transiently restrains the continuous distal movement of bEps when they pass over pObs. For ray branching morphogenesis, Shh/Smo-enhanced cell adhesion between pObs and successive waves of bEps could enable the pOb pool to gradually follow laterally splitting *shha*-expressing bEp domains. Eventually, the divided pOb pools would then form separate daughter rays connected at a branch point.

315

320

## DISCUSSION

### Basal epidermal movements and Shh/Smo signaling direct skeletal branching morphogenesis during zebrafish fin ray development and regeneration

325 Zebrafish fin ray branching provides an accessible context to define mechanisms of appendage patterning and skeletal morphogenesis. Our current and earlier study (Armstrong et al., 2017) extends previous research to demonstrate the same Shh-dependent branching morphogenesis mechanism branches developing and regenerating rays. In both contexts, a gradually splitting domain of Shh-expressing basal epidermal cells (bEps) at the distal aspect of each outgrowing fin ray partitions the immediately adjacent pre-osteoblast (pOb) pool. Highly localized, continuous Shh/Smo activity allows a given ray's distal pOb population to gradually follow the separating Shh<sup>+</sup> basal epidermal domains. Eventually fully split, divided pOb pools continue to promote outgrowth of now two rays connected at a branch point. The shared mechanism of pOb positioning for ray branching underscores that fin regeneration re-activates developmental mechanisms. Strikingly, Smo-dependent Shh signaling appears largely dedicated to ray branching in all fins with pathway inhibition producing minimal or no effects on initial fin patterning, outgrowth, or skeletal differentiation during fin development or regeneration.

340 Our study of the readily observable developing caudal fin highlights how collective migration of Shh<sup>+</sup> bEps positions pObs to generate branched rays. Our Kaede photoconversion and time-lapse imaging show bEps continuously move distally in growing fins, activating *shha* expression upon reaching the distal zone that includes pObs. Individual bEps pass through the *shha*-expressing domain, down-regulate *shha* when moving beyond the pObs, and then are shed from the end of the fin. In turn, proximal bEps enter the distal zone and activate *shha* to replenish

345



the *shha*-expressing basal epidermal domain adjacent to pObs. Shha produces a constant Smo-dependent response in neighboring pObs and an autocrine, transient response in *shha*-producing bEps as represented by upregulated *ptch2* in both cell types. This continuous, localized Hh/Smo signaling regulates bEp collective movement dynamics and promotes ray branching by enabling  
350 concomitant separation of pOb pools with lateral splitting *shha* basal epidermal domains.

Shh/Smo signaling is involved in branching morphogenesis of other organs, including the lung (Bellusci et al., 1997; Fernandes-Silva et al., 2017; Pepicelli et al., 1998) and submandibular salivary gland (Jaskoll et al., 2004). In the lung, Shh/Smo also mediates interactions between  
355 mesenchymal and epithelial populations although likely by promoting local proliferation and/or differentiation (Kim et al., 2015). Collective cell migration also is broadly implicated in branching morphogenesis, including for renal tubes, mammary glands and blood vessels (Ewald et al., 2008; Riccio et al., 2016; Spurlin & Nelson, 2017). Unlike those contexts, we propose a neighboring cell type – basal epidermis – that does not directly contribute to the final tissue  
360 provides the instructive collective movements. This unusual arrangement may reflect regenerating fin pObs having a mesenchymal state during patterning before returning to their differentiated epithelial state (Stewart et al., 2014).

### **Shh/Smo signaling may position pre-osteoblasts by promoting their adhesion to moving 365 basal epidermal cells**

Continuous Shh/Smo signaling through fin development and retained splitting of Shh-expressing basal epidermal domains when the pathway is inhibited indicate Shh/Smo has a permissive role in ray branching. We favor a model whereby Shh/Smo's function is to promote

transient cell adhesion between bEps and pObs. The transient nature may result from the moving  
370 bEps rapidly terminating their *shha* expression and *ptch2*-defined Shh/Smo activity. A slight  
lateral component to bEp movements away from the midline of each forming ray would then  
successively tug contacting pObs to follow. Over the course of several days, pObs eventually are  
pulled into two pools. The pOb pools become sufficiently and irreversibly separated to now  
generate branched daughter rays.

375

Our 3-D reconstructions showing Shh-expressing bEps and Runx2-expressing pObs  
likely share extensive and intimate physical contacts are consistent with this heterotypic cell  
adhesion model. The time-lapse imaging of developing caudal fins provides functional support  
by showing Shh/Smo signaling impedes bEp distal movements. Notably, Shh-expressing bEps  
380 accelerate when they pass beyond Shh-responding pObs. Chemical inhibition of Shh/Smo  
signaling significantly increases overall Ptch2-positive bEp migration rates and eliminates the  
characteristic velocity decrease when Shh-expressing bEps pass adjacent to pObs. While  
inhibiting Shh/Smo signaling accelerates individual bEp cell movements, a steady-state Shh-  
expressing basal epidermal domain persists and at least partially splits. However, the pObs  
385 cannot follow without Shh/Smo signaling to promote adhesion with bEps and therefore remain  
as a single pOb pool that forms an unbranched ray.

We favor Shh/Smo-promoted adhesion-based skeletal positioning over alternative  
hypotheses for additional reasons. First, Shh/Smo-dependent cell proliferation is not observed  
390 during development or regeneration (Armstrong et al., 2017), arguing against a model whereby  
Shh promotes localized proliferation at the margins of a given pOb pool progressively dividing

it. Notably, previous conclusions that Shh/Smo signaling is a pro-proliferative factor in regenerating fins (Y. Lee et al., 2009; Quint et al., 2002) may reflect off-target cyclopamine effects (Armstrong et al., 2017). In contrast, fins develop and regenerate to normal size when  
395 using BMS-833923 to block Shh/Smo signaling with the intriguing exception of the two peripheral rays and their surrounding tissue. Second, all Shh/Smo-responsive cells remain outwardly specified upon Shh/Smo inhibition, including osteoblasts that still differentiate to produce ray skeletal units complete with joints. Any additional Shha or other Hedgehog ligand roles, if existent, would seem Smo-independent, as with Indian Hedgehog A (Ihha) and bone  
400 maturation during fin regeneration (Armstrong et al., 2017). Third, we use chemical genetics to map the Shh/Smo time-of-function and show ray branching requires persistent Shh/Smo signaling from initial hints of Shh-expressing basal epidermal domain splitting until daughter rays are fully separated. Therefore, Shh/Smo signaling promotes a continuous rather than switch-like mechanism acting throughout the morphogenesis process.

405

### **Short range Shh promoting cell adhesion may be a common Shh/Smo signaling mode**

Our proposed short range Shh/Smo signaling mode promoting heterotypic cell adhesion differs from Hh's more typical role as a gradient-forming morphogen. Providing precedence, Hh acts on neighboring cells in several well-established contexts. For example, Hh famously  
410 mediates interactions between directly adjacent cells during *Drosophila* embryo segment boundary formation (Ingham, 1993). Short-range Shh/Smo signaling also occurs in vertebrates, including mammalian hair follicle development (Millar, 2002; Sato et al., 1999; Woo et al., 2012), avian limb patterning (Sanders et al., 2013), and zebrafish retina development (Shkumatava et al., 2004). Perhaps most germane, *shha*<sup>+</sup> epidermal cells organize directly

415 underlying Hh-responsive dermal cells during zebrafish scale morphogenesis (Aman et al.,  
2018).

Shh/Smo has also been tied to cell adhesion in other settings. For example, Hh's  
archetypal role in *Drosophila* wing disc compartment boundary establishment (Ayers et al.,  
420 2010) may be through increased "cell bonding" (Rudolf et al., 2015). Shh alters neural crest cell  
adhesion and migration during avian neural tube morphogenesis (Fournier-Thibault et al., 2009;  
Jarov et al., 2003; Testaz et al., 2001). Further, misregulated Shh/Smo signaling is linked to  
invasive cell migration associated with liver, breast, ovarian, and skin cancers (Chen et al., 2013;  
Chen et al., 2014; Hanna & Shevde, 2016; Zeng et al., 2017).

425

Identification and characterization of Shh/Smo-upregulated adhesion molecules would  
strengthen a heterotypic cell adhesion model for ray branching. One intriguing possible  
mechanism is that Shh/Smo-upregulated Patched directly binds to non-secreted Shh retained on  
bEp surfaces to increase high-affinity contacts between pObs and bEps. This mechanism could  
430 apply elsewhere given Patched is an evolutionary-conserved Shh/Smo-target gene (Alexandre et  
al., 1996; Goodrich et al., 1996; Lorberbaum et al., 2016; Marigo et al., 1996) while placing  
Patched in the curious position as both a Shh/Smo effector and negative feedback regulator.  
Alternatively, Shh/Smo activity could increase expression of more traditional cell adhesion  
factors or promote cell features (e.g. shape, polarity, or interconnectivity) that indirectly favor  
435 heterotypic adhesion. Regardless, our adhesion model assigns Shh/Smo a permissive role with  
*shha*<sup>+</sup> basal epidermal domain splitting instructing branching. Therefore, how *shha* is activated

when bEps enter distal fin outgrowth zones containing pObs and how *shha*+ bEp domains laterally split are key unresolved questions.

#### 440 **Fin ray branching as an ancestral mechanism of Shh-mediated appendage patterning and skeletal morphogenesis**

How vertebrates pattern skeletal appendages (fins, limbs) is a textbook question of evolutionary and developmental biology. Fin rays comprise dermal bone opposed to endochondral bone found in tetrapod limbs with rays considered lost in tetrapod lineages. 445 However, teleost fin dermal skeleton and tetrapod digits may share deep evolutionary homology (Nakamura et al., 2016). If so, our demonstration Shh/Smo signaling supports developmental ray branching morphogenesis is intriguing given Shh's long-appreciated but mechanistically distinct role in vertebrate digit patterning. Shh is the secreted morphogen produced by the zone of polarizing activity (ZPA) at the posterior edge of developing limb buds that directs anterior-to- 450 posterior patterning of skeletal elements including digits (Cohn et al., 2002; Riddle et al., 1993; Tickle, 2017). Polarized *shha* expression in zebrafish pectoral fin buds indicates paired fins may follow ZPA-like skeletal patterning (Akimenko & Ekker, 1995; Krauss et al., 1993; Neumann et al., 1999). In contrast, caudal fin primordia lack polarized *shha* (Hadzhiev et al., 2007; Laforest et al., 1998), our results). Consistently, we found disrupting Shh/Smo signaling even prior to 455 formation of the caudal fin field does not alter the initial complement of 18 rays. Moreover, we demonstrate Shh/Smo signaling is required for ray branching in all fins, whether paired and unpaired. The unpaired medial fins (dorsal, caudal, anal) evolved prior to paired fin appendages (Dahn et al., 2006; Desvignes et al., 2018; Freitas et al., 2006; Larouche et al., 2017). Therefore, Shh-dependent ray branching may reflect an ancestral skeletal morphogenesis mechanism that

460 predates emergence of ZPA-based appendage patterning. Interestingly, our proposed ray  
branching morphogenesis mechanism also hearkens a classic view that limb skeletal patterns  
progressively form by the unfolding of a series of three events: de novo cartilage condensations,  
branching, and segmentation (Oster et al., 1988; Shubin & Alberch, 1986).

465 Shh/Smo signaling promotes skeletal morphogenesis in many contexts. In zebrafish,  
Shh/Smo patterns craniofacial dermal bones, as illustrated by the opercle (Huycke et al., 2012),  
and both developing and regenerating scales (Aman et al., 2018). Shh/Smo signaling also  
impacts mesenchymal cell movements to pattern bird feathers, another albeit non-ossified skin  
appendage (Li et al., 2018). Shh further supports patterning of the axial skeleton (Chiang et al.,  
470 1996; Choi et al., 2012; Dworkin et al., 2016; Hu et al., 2015; Hu & Helms, 1999; Jeong et al.,  
2004; Swartz et al., 2012) as well as teeth (Ahn et al., 2010; Dassule et al., 2000; Seppala et al.,  
2017). Our discovery Shh/Smo signaling enables neighboring cells to position pObs during fin  
ray branching suggests similar mechanisms act in other skeletal patterning contexts. If so,  
manipulating Shh/Smo pathway to position therapeutically delivered or endogenous progenitor  
475 cells could enhance skeletal regenerative medicine.

## MATERIALS AND METHODS

### Zebrafish

*Danio rerio* zebrafish were maintained in 28-29°C circulating fish water within the University of Oregon Aquatic Animal Care Services (UO AqACS) fish facility. The following lines were used: wildtype AB, *Tg(sp7:EGFP)<sup>b1212</sup>* (DeLaurier et al., 2010), *TgBAC(ptch2:Kaede)<sup>a4596</sup>* (Huang et al., 2012), *Tg(-2.4shha:gfp:ABC)<sup>sb15</sup>* [previously known as *Tg(-2.2shh:gfp:ABC)*] (Ertzer et al., 2007; Shkumatava et al., 2004), *Tg(runx2:mCherry)* (Shannon Fisher Lab, unpublished). The University of Oregon Institutional Animal Care and Use Committee (IACUC) approved zebrafish experiments.

### Microscopy

Larval and juvenile fish were anesthetized with 74 µg/ml tricaine (MS-222, Syndel) in fish facility system water. Fish or dissected fins were transferred immediately to a 35 mm glass bottom FluoroDish plate (World Precision Instruments). Two or three drops of 1% low-melt agarose, stored at 38°C and cooled before application, were placed on the caudal fin. Fins were quickly flattened to the FluoroDish with a single-hair paintbrush before the agarose hardened. The following microscopes were used: Nikon Eclipse Ti-E widefield and Nikon Eclipse Ti2-E with Yokogawa CSU-W1 spinning disk attachments, and Zeiss LSM 880 laser scanning confocal microscope. Confocal image stacks were processed using Imaris software to generate single optical slice digital sections, surface renderings, and 3D reconstructions. Adobe Photoshop was used to adjust levels with identical image acquisition and processing settings for a given experiment. Live fish promptly were euthanized or returned to tanks after imaging.

500 **Kaede photoconversion and imaging**

*ptch2:Kaede* fish were anesthetized and placed on FluoroDish plates as described above. Fins were viewed with a Nikon Eclipse Ti-E widefield microscope or Nikon Ti2-E/ Yokogawa CSU-W1 spinning disk confocal microscope. Kaede-expressing regions of interest (ROIs) were photoconverted using a metal halide light source and DAPI excitation filter or with 405 nm laser illumination from 10 seconds to 2 minutes, depending on ROI size and fish age. Before and after images were acquired to ensure complete photoconversion of Kaede from green (518 nm) to red (580 nm) emission. Fish were returned to system water and then similarly re-imaged after defined periods.

510 **BMS-833923 treatments**

BMS-833923 (“BMS”, Cayman Chemicals) was dissolved in DMSO to a concentration of 6.3-12.5 mM. This stock was diluted to a final concentration of 0.63-1.25  $\mu$ M in system fish water for both larval and juvenile zebrafish treatments. Equal volumes of DMSO were used for control group treatments.

515

To test Hh/Smo requirements for caudal fin ray branching, 25 dpf *sp7:EGFP* fish ( $n=6$  per group) with unbranched rays were treated initially for 24 hours in BMS or DMSO-alone water and then returned to standard housing. Fish were exposed to BMS for 4 hours every other day until the experimental end point at 42 dpf. To assess Hh/Smo roles in all fin appendages, *shha:GFP;runx2:mCherry* fish were treated with 1.25  $\mu$ M BMS or DMSO ( $n= 6$  per group) from 21 to 42 dpf. Fins were dissected and imaged as described above.



For staggered-start juvenile fish treatments, 25 dpf *sp7:EGFP* fish were anesthetized, fluorescently screened, and sorted into groups of those having caudal fins with “unbranched” rays or fins in which branching had initiated but was incomplete (“during”). Fish from the two groups were then treated with BMS as described above. Untreated clutchmate *sp7:EGFP* fish were returned to standard housing and screened every other day until all fish had developed branched rays. Drug treatment of the “branched” group of fish was started at 35 dpf. All treatments ended at 42 dpf, when fins were mounted and imaged as described. For BMS-treated fish (unbranched, during branching, and branched),  $n=4$  or 5 fish per group with  $n=2$  or 3 for DMSO-treated control groups.

For early larval development studies, *sp7:EGFP;runx2:mCherry* and *ptch2:Kaede* fish were bathed in 1.25  $\mu$ M BMS starting at 2 dpf alongside DMSO-treated controls ( $n=33-44$  fish per group, per clutch). The same drug exposure regiment described for juvenile fish was used. From 2-4 dpf, larvae were treated in 40 mL embryo media in petri dishes. From 5-14 dpf, fish were drug-exposed in beakers containing 125 mL embryo media. Drug efficacy on larval fish was assessed by photoconverting distal fin ROIs of *ptch2:Kaede* fins (photoconversion methods described above) at 13 dpf and re-imaging those regions at 14 dpf ( $n=3-5$  per group). All fish were screened for skeletal patterning phenotypes by widefield microscopy. Across clutches, 35/44 (79.5%) BMS-treated larvae developed normally (9/44 or 20.5% were runted) compared to 26/33 (78.8%) DMSO-treated larvae (7/33 or 21.2% were runted). The ~20% incidence of developmentally delayed larvae was likely caused by extended periods in 250 mL beakers instead of larger nursery tanks. Regardless, nearly all larvae irrespective of size in both groups developed the normal complement of 18 caudal fin rays.

### Ray morphometrics

Ray lengths were assessed for *sp7:EGFP* clutch mates treated from 25-42 dpf with BMS-833923 or DMSO (experiment described above,  $n=6$  per group). Using Fiji-ImageJ software, the Principal Peripheral Ray (unbranching lateral ray) and Dorsal Ray 3 (longest branching ray) were measured from 42 dpf endpoint caudal fin images from the proximal base of the fin to the distal fin end. Raw and normalized data were graphed with GraphPad Prism V8 and significance assessed with a Student's unpaired t-test.

### Whole mount immunostaining

*shha:GFP* caudal fins were harvested at 22-23 dpf and immediately fixed in 4% PFA/PBS overnight at 4°C or for 4 hours at room temperature. Fins were washed extensively in PBS + 0.1% Tween-20 and blocked in 1x PBS, 1% Triton X-100, 5% Normal Goat Serum, and 10% DMSO buffer overnight at 4°C. Fins were incubated with primary antibodies in blocking buffer overnight at 4°C. Primary antibodies were anti-GFP (1:1000; AVES, GFP-1020), anti-Tp63 (1:100; Thermo Fisher, PA5-36069) and anti-Runx2 (1:100; Santa Cruz Biotechnology, sc-101145). Fins were washed in a high-salt 500 mM NaCl buffer for 30 min followed by extensive washes in PBS + 0.1% Tween-20. Secondary antibody incubations using Alexa Fluor conjugates (Thermo Fisher) were performed overnight protected from light at 4°C at a concentration of 1:1000 in blocking buffer. Fins were then washed extensively in PBS + 0.1% Tween-20, nuclei stained with Hoechst (Thermo Fisher), and mounted with SlowFade Diamond Antifade (Thermo Fisher).

### Paraffin section immunostaining

Dissected 32 dpf *shha:GFP* caudal fins were fixed in 4% PFA/PBS overnight at 4°C. After  
570 extensive PBS washing, fins were decalcified for 4 days in 0.5M EDTA, pH 8.0 with daily  
solution changes. Fins then were dehydrated in an ethanol series and tissue cleared with xylenes  
prior to longitudinal embedding in paraffin wax. 7 µm sections were cut on a Leica RM255  
microtome. Antigen retrieval was performed on rehydrated sections using 1 mM EDTA + 0.1%  
575 Tween-20 for 5 minutes in a pressure cooker. Following PBS washes, sections were blocked in  
1x PBS, 10% nonfat dry milk, 2% normal goat serum, and 4% fetal bovine serum for a minimum  
of 1 hour. Sections were incubated overnight at 4°C with primary antibodies in blocking  
solution. Primary antibodies were: anti-GFP (1:3000; AVES, GFP-1020), anti-Tp63 (1:100;  
Thermo Fisher, PA5-36039), anti-Laminin (1:40; Sigma, L9393), and anti-Zns5 (1:5, ZIRC).  
Sections were washed in PBS containing 500 mM NaCl + 0.1% Tween-20. Alexa Fluor  
580 conjugated secondary antibodies (Thermo Fisher) were diluted 1:1000 in blocking buffer and  
incubated for 1 hour at room temperature protected from light. Sections were washed, nuclei  
stained with Hoechst, and mounted with SlowFade Gold Antifade (Thermo Fisher). Images were  
acquired on a Zeiss LSM 880 laser scanning confocal microscope and images processed with  
Fiji-ImageJ, Imaris, and Adobe Photoshop.

585

### **In vivo EdU incorporation assays**

29 dpf *shha:GFP* juvenile fish were treated with DMSO or 1.25 µM BMS for 4 hours in groups  
of  $n=5$ . Anesthetized fish were injected intraperitoneally with 5 µl of 1 mg/mL EdU (Thermo  
Fisher) in sterile PBS, monitored for recovery for 10 minutes in fresh facility water, and then  
590 returned to treatment tanks. 12 hours post-injection, caudal fins were amputated and fixed for 4  
hours at room temperature in 4% PFA/PBS. Fins were washed thoroughly with PBS and blocked

overnight at 4°C in PBS/1% Triton X-100/5% Normal Donkey Serum/10% DMSO. EdU signal was detected with Click-iT Plus Alexa Fluor 647 Picolyl Azide (ThermoFisher) at 2.5 µl/ mL according to the manufacturer's protocol. Following EdU detection, whole-mount GFP  
595 immunostaining and Hoechst nuclear staining was performed as described below. Whole mount confocal images were acquired using a Zeiss 880 LSM and 3D reconstructions prepared using Imaris. EdU+ and total intra-ray nuclei, i.e. from cells located in between the epidermal Shh domains of each hemi-ray, were identified and scored for Rays 2 and 3 using the Imaris "Spots" function and the following parameters: ROI around length of Shha:GFP+ domain, Quality  
600 Threshold 0.642, cell diameter 3 microns. Quantification of EdU+ cells is expressed as the number of EdU+ intra-ray cells over total number of Hoechst-stained nuclei.

### **Cell migration imaging and analysis**

Fish were anesthetized sequentially in freshly prepared 74 µg/ml tricaine solution for 3 minutes  
605 and monitored for slowed opercular movements. Anesthetized fish were transferred to a 35 mm FluoroDish plate and mounted in 3% low melt agarose as described earlier. Set agarose was carefully removed from the most distal region of the caudal fin to allow for free movement of the epidermis while the trunk remained adhered to the FluoroDish. 74 µg/ml of tricaine solution was added to maintain anesthesia and cover the fin. After imaging, fish were returned to system water  
610 to confirm recovery and then promptly euthanized. Fish that did not recover were excluded from downstream cell migration analyses. We occasionally observed extremely rapid epidermal movements in which entire *shha:GFP+* domains would be shed from rays in <15 min. We suspect this phenomenon results from elevated stress, anesthesia intolerance, and/or damage from plate surface contact or agarose application. We excluded these animals from analyses.

615

For bulk cell migration assays, 22-24 dpf *ptch2:Kaede* fish were treated with 0.63  $\mu$ M BMS or DMSO ( $n=8$  per group). 24 hours later, fish were mounted and imaged with a Nikon Eclipse Ti-E widefield microscope every 1 minute for 30 minutes. Imaris was used to automatically track cells for 3-6 single *ptch2:Kaede*<sup>+</sup> basal epidermal cells on dorsal rays 2-5 for each fish. All tracks were quality checked to confirm individual cell tracking. Individual average cell speeds ( $n=38$  cells per group) and then averages for each animal were determined. Statistical significance tests comparing all cells tracked ( $n=38$  cells per group) and mean cell speed per fish ( $n=8$  fish per group) used Student's unpaired t-tests.

620

625

For position-dependent cell migration assays, 21-24 dpf *shha:GFP;runx2:mCherry* fish were treated with DMSO or 1.25  $\mu$ M BMS for 24 hours prior to imaging. Fish were imaged every 2 minutes for 30 minutes with full z-stacks using a Nikon Ti2-E with a Yokogawa CSU-W1 SoRa spinning disk confocal unit. A single hemi-ray of Ray 2 or Ray 3 was analyzed for each time-lapse video. If both rays were captured, the ray with more pObs in frame was analyzed to avoid oversampling individuals. GFP<sup>+</sup> cells were automatically tracked using Imaris software "Spots" algorithms with the following parameters: estimated cell diameter 5 microns, maximum distance between frames 6 microns, maximum gap between frames 3 time points. Each cell track was quality checked using 3D reconstructions and edited if Imaris assigned multiple cells to one track or fragmented the track of a given cell. 26-41 cells were tracked across 9 fish ( $n=5$  for DMSO and  $n=4$  for BMS groups, respectively) for a total of  $n=159$  for DMSO-treated and  $n=135$  for BMS-treated fish. Data was normalized for each fish by dividing the track speed of a single cell by the average of all cells tracked for that fish. Positional data was determined by setting the X-

630

635

position of the most distal Runx2+ pOb as “0” and assigning a relative initial X-position for each  
*shha:GFP+* cell. Cells with a negative starting position were therefore pOb-associated while  
640 those with a positive starting position had already migrated beyond the pOb pool when video  
acquisition began. Imaris was used to determine each cell’s total X-displacement and track  
speed. Graphs were generated using GraphPad Prism V8. Fourth-order best-fit polynomial  
curves were added to position/speed graphs to help visualize data trends.

## ACKNOWLEDGEMENTS

645 We thank the University of Oregon AqACS Facility for zebrafish care; the University of Oregon zebrafish community for support; A. Delaurier and C. Kimmel for *Tg(sp7:EGFP)b1212* fish; S. Megason for providing the *TgBAC(ptch2:Kaede)a4596* fish developed in A. Schier's lab and the *Tg(-2.4shha:gfp:ABC)sb15* fish developed in U. Strahle's lab; G. Crump for providing the *runx2:mCherry* fish generated by S. Fisher's group; and C. Kimmel, A. Saera-Vila, and the  
650 Stankunas lab for input.

## FOOTNOTES

### Competing interests

None.

### 655 Author contributions

J.A.B, A.E.R. and K.S. designed experiments with input from S.S.; J.A.B and A.E.R. performed experiments; J.A.B, A.E.R. and K.S. prepared and wrote the manuscript.

### Funding

The National Institutes of Health (NIH) provided research funding (1R01GM127761 (K. S. and  
660 S. S.). J.A.B. had an Experiencing Science Practices through Research to Inspire Teaching (ESPRIT) award supported by the National Science Foundation's Robert Noyce Teacher Scholarship Program, a Mary G. Alden Scholarship, and an Institute of Molecular Biology Summer Scholarship. A.E.R. received support from the University of Oregon Genetics Training Program (5T32GM007413).

### 665 Data and material availability

Requests for materials should be addressed to K. S.

## REFERENCES

- 670 **Ahn, Y., Sanderson, B. W., Klein, O. D. and Krumlauf, R.** (2010). Inhibition of Wnt signaling by Wise (Sostdc1) and negative feedback from Shh controls tooth number and patterning. *Development* **137**, 3221–3231.
- Akimenko, M.-A. and Ekker, M.** (1995). Anterior Duplication of the Sonic hedgehog Expression Pattern in the Pectoral Fin Buds of Zebrafish Treated with Retinoic Acid. *Dev. Biol.* **170**, 243–247.
- 675 **Alexandre, C., Jacinto, A. and Ingham, P. W.** (1996). Transcriptional activation of hedgehog target genes in *Drosophila* is mediated directly by the cubitus interruptus protein, a member of the GLI family of zinc finger DNA-binding proteins. *Genes Dev.* **10**, 2003–2013.
- Aman, A. J., Fulbright, A. N. and Parichy, D. M.** (2018). Wnt/ $\beta$ -catenin regulates an ancient signaling network during zebrafish scale development. *Elife* **7**, e37001.
- 680 **Anderson, E., Peluso, S., Lettice, L. A. and Hill, R. E.** (2012). Human limb abnormalities caused by disruption of hedgehog signaling. *Trends Genet.* **28**, 364–373.
- Armstrong, B. E., Henner, A., Stewart, S. and Stankunas, K.** (2017). Shh promotes direct interactions between epidermal cells and osteoblast progenitors to shape regenerated zebrafish bone. *Development* **144**, 1165–1176.
- 685 **Ayers, K. L., Gallet, A., Staccini-Lavenant, L. and Thérond, P. P.** (2010). The Long-Range Activity of Hedgehog Is Regulated in the Apical Extracellular Space by the Glypican Dally and the Hydrolase Notum. *Dev. Cell* **18**, 605–620.
- Bellusci, S., Furuta, Y., Rush, M. G., Henderson, R., Winnier, G. and Hogan, B. L.** (1997). Involvement of Sonic hedgehog (Shh) in mouse embryonic lung growth and morphogenesis. *Development* **124**, 53–63.
- 690 **Chen, J.-S., Huang, X., Wang, Q., Huang, J.-Q., Zhang, L., Chen, X.-L., Lei, J. and Cheng, Z.-X.** (2013). Sonic hedgehog signaling pathway induces cell migration and invasion through focal adhesion kinase/AKT signaling-mediated activation of matrix metalloproteinase (MMP)-2 and MMP-9 in liver cancer. *Carcinogenesis* **34**, 10–19.
- 695 **Chen, Q., Xu, R., Zeng, C., Lu, Q., Huang, D., Shi, C., Zhang, W., Deng, L., Yan, R., Rao, H., et al.** (2014). Down-Regulation of Gli Transcription Factor Leads to the Inhibition of Migration and Invasion of Ovarian Cancer Cells via Integrin  $\beta$ 4-Mediated FAK Signaling. *PLoS One* **9**, e88386.
- 700 **Chiang, C., Litingtung, Y., Harris, M. P., Simandl, B. K., Li, Y., Beachy, P. A. and Fallon, J. F.** (2001). Manifestation of the Limb Prepatterning: Limb Development in the Absence of Sonic Hedgehog Function. *Dev. Biol.* **236**, 421–435.



- Chiang, C., Litingtung, Y., Lee, E., Young, K. E., Corden, J. L., Westphal, H. and Beachy, P. A.** (1996). Cyclopia and defective axial patterning in mice lacking Sonic hedgehog gene function. *Nature* **383**, 407–413.
- 705 **Choi, K.-S., Lee, C. and Harfe, B. D.** (2012). Sonic hedgehog in the notochord is sufficient for patterning of the intervertebral discs. *Mech. Dev.* **129**, 255–262.
- Cohn, M. J., Lovejoy, C. O., Wolpert, L. and Coates, M. I.** (2002). Branching, segmentation and the metapterygial axis: pattern versus process in the vertebrate limb. *BioEssays* **24**, 460–465.
- 710 **Dahn, R. D., Davis, M. C., Pappano, W. N. and Shubin, N. H.** (2006). Sonic hedgehog function in chondrichthyan fins and the evolution of appendage patterning. *Nature* **445**, 311–314.
- Dassule, H. R., Lewis, P., Bei, M., Maas, R. and McMahon, A. P.** (2000). Sonic hedgehog regulates growth and morphogenesis of the tooth. *Development* **127**, 4775–4785.
- 715 **DeLaurier, A., Eames, B. F., Blanco-Sánchez, B., Peng, G., He, X., Swartz, M. E., Ullmann, B., Westerfield, M. and Kimmel, C. B.** (2010). Zebrafish sp7:EGFP: A transgenic for studying otic vesicle formation, skeletogenesis, and bone regeneration. *genesis* **48**, 505–511.
- Desvignes, T., Carey, A., Braasch, I., Enright, T. and Postlethwait, J. H.** (2018). Skeletal development in the heterocercal caudal fin of spotted gar (*lepisosteus oculatus*) and other lepisosteiformes. *Dev. Dyn.* **247**, 724–740.
- 720 **Dworkin, S., Boglev, Y., Owens, H. and Goldie, S. J.** (2016). The Role of Sonic Hedgehog in Craniofacial Patterning, Morphogenesis and Cranial Neural Crest Survival. *J. Dev. Biol.* **4**, 24.
- 725 **Ertzer, R., Müller, F., Hadzhiev, Y., Rathnam, S., Fischer, N., Rastegar, S. and Strähle, U.** (2007). Cooperation of sonic hedgehog enhancers in midline expression. *Dev. Biol.* **301**, 578–589.
- Ewald, A. J., Brenot, A., Duong, M., Chan, B. S. and Werb, Z.** (2008). Collective epithelial migration and cell rearrangements drive mammary branching morphogenesis. *Dev. Cell* **14**, 570–581.
- 730 **Fernandes-Silva, H., Correia-Pinto, J. and Moura, R. S.** (2017). Canonical Sonic Hedgehog Signaling in Early Lung Development. *J. Dev. Biol.* **5**, 3.
- Fournier-Thibault, C., Blavet, C., Jarov, A., Bajanca, F., Thorsteinsdóttir, S. and Duband, J.-L.** (2009). Sonic Hedgehog Regulates Integrin Activity, Cadherin Contacts, and Cell Polarity to Orchestrate Neural Tube Morphogenesis. *J. Neurosci.* **29**, 12506–12520.

- 735 **Freitas, R., Zhang, G. and Cohn, M. J.** (2006). Evidence that mechanisms of fin development evolved in the midline of early vertebrates. *Nature* **442**, 1033–1037.
- Goodrich, L. V, Johnson, R. L., Milenkovic, L., McMahon, J. A. and Scott, M. P.** (1996). Conservation of the hedgehog/patched signaling pathway from flies to mice: induction of a mouse patched gene by Hedgehog. *Genes Dev.* **10**, 301–312.
- 740 **Hadzhiev, Y., Lele, Z., Schindler, S., Wilson, S. W., Ahlberg, P., Strähle, U. and Müller, F.** (2007). Hedgehog signaling patterns the outgrowth of unpaired skeletal appendages in zebrafish. *BMC Dev. Biol.* **7**, 75.
- Hanna, A. and Shevde, L. A.** (2016). Hedgehog signaling: modulation of cancer properties and tumor microenvironment. *Mol. Cancer* **15**, 24.
- 745 **Hu, D. and Helms, J. A.** (1999). The role of sonic hedgehog in normal and abnormal craniofacial morphogenesis. *Development* **126**, 4873–4884.
- Hu, D., Young, N. M., Li, X., Xu, Y., Hallgrímsson, B. and Marcucio, R. S.** (2015). A dynamic Shh expression pattern, regulated by SHH and BMP signaling, coordinates fusion of primordia in the amniote face. *Development* **142**, 567–574.
- 750 **Huang, P., Xiong, F., Megason, S. G. and Schier, A. F.** (2012). Attenuation of Notch and Hedgehog Signaling Is Required for Fate Specification in the Spinal Cord. *PLoS Genet.* **8**, e1002762.
- Huycke, T. R., Eames, B. F. and Kimmel, C. B.** (2012). Hedgehog-dependent proliferation drives modular growth during morphogenesis of a dermal bone. *Development* **139**, 2371–2380.
- 755 **Ingham, P. W.** (1993). Localized hedgehog activity controls spatial limits of wingless transcription in the *Drosophila* embryo. *Nature* **366**, 560–562.
- Jaskoll, T., Leo, T., Witcher, D., Ormestad, M., Astorga, J., Bringas, P., Carlsson, P. and Melnick, M.** (2004). Sonic hedgehog signaling plays an essential role during embryonic salivary gland epithelial branching morphogenesis. *Dev. Dyn.* **229**, 722–732.
- 760 **Jeong, J., Mao, J., Tenzen, T., Kottmann, A. H. and McMahon, A. P.** (2004). Hedgehog signaling in the neural crest cells regulates the patterning and growth of facial primordia. *Genes Dev.* **18**, 937–951.
- 765 **Kim, H. Y., Pang, M.-F., Varner, V. D., Kojima, L., Miller, E., Radisky, D. C. and Nelson, C. M.** (2015). Localized Smooth Muscle Differentiation Is Essential for Epithelial Bifurcation during Branching Morphogenesis of the Mammalian Lung. *Dev. Cell* **34**, 719–726.

- Krauss, R. S., Concordet, J. and Ingham, P. W.** (1993). A functionally conserved homolog of the *Drosophila* segment polarity gene *hh* is expressed in tissues with polarizing activity in zebrafish embryos. *Cell* **75**, 1431–1444.
- 770 **Laforest, L., Brown, C. W., Poleo, G., Géraudie, J., Tada, M., Ekker, M. and Akimenko, M. A.** (1998). Involvement of the sonic hedgehog, *patched 1* and *bmp2* genes in patterning of the zebrafish dermal fin rays. *Development* **125**, 4175–4184.
- Larouche, O., Zelditch, M. L. and Cloutier, R.** (2017). Fin modules: an evolutionary perspective on appendage disparity in basal vertebrates. *BMC Biol.* **15**, 32.
- 775 **Lee, H. and Kimelman, D.** (2002). A Dominant-Negative Form of p63 Is Required for Epidermal Proliferation in Zebrafish. *Dev. Cell* **2**, 607–616.
- Lee, Y., Hami, D., Val, S. De, Kagermeier-Schenk, B., Wills, A. A., Black, B. L., Weidinger, G. and Poss, K. D.** (2009). Maintenance of blastemal proliferation by functionally diverse epidermis in regenerating zebrafish fins. *Dev. Biol.* **331**, 270–280.
- 780 **Li, A., Cho, J.-H., Reid, B., Tseng, C.-C., He, L., Tan, P., Yeh, C.-Y., Wu, P., Li, Y., WidELITZ, R. B., et al.** (2018). Calcium oscillations coordinate feather mesenchymal cell movement by SHH dependent modulation of gap junction networks. *Nat. Commun.* **9**, 5377.
- Lin, T. L. and Matsui, W.** (2012). Hedgehog pathway as a drug target: Smoothed inhibitors in development. *Onco. Targets. Ther.* **5**, 47–58.
- 785 **Lorberbaum, D. S., Ramos, A. I., Peterson, K. A., Carpenter, B. S., Parker, D. S., De, S., Hillers, L. E., Blake, V. M., Nishi, Y., McFarlane, M. R., et al.** (2016). An ancient yet flexible cis-regulatory architecture allows localized Hedgehog tuning by *patched/Ptch1*. *Elife* **5**, e13550.
- Malik, S.** (2012). Syndactyly: phenotypes, genetics and current classification. *Eur. J. Hum. Genet.* **20**, 817.
- 790 **Marigo, V., Scott, M. P., Johnson, R. L., Goodrich, L. V and Tabin, C. J.** (1996). Conservation in hedgehog signaling: induction of a chicken *patched* homolog by Sonic hedgehog in the developing limb. *Development* **122**, 1225–1233.
- Millar, S. E.** (2002). Molecular Mechanisms Regulating Hair Follicle Development. *J. Invest. Dermatol.* **118**, 216–225.
- 795 **Nakamura, T., Gehrke, A. R., Lemberg, J., Szymaszek, J. and Shubin, N. H.** (2016). Digits and fin rays share common developmental histories. *Nature* **537**, 225.
- Neumann, C. J., Grandel, H., Gaffield, W., Schulte-Merker, S. and Nüsslein-Volhard, C.** (1999). Transient establishment of anteroposterior polarity in the zebrafish pectoral fin bud in the absence of sonic hedgehog activity. *Development* **126**, 4817–4826.
- 800

- Oster, G. F., Shubin, N., Murray, J. D. and Alberch, P.** (1988). EVOLUTION AND MORPHOGENETIC RULES: THE SHAPE OF THE VERTEBRATE LIMB IN ONTOGENY AND PHYLOGENY. *Evolution (N. Y.)* **42**, 862–884.
- 805 **Quint, E., Smith, A., Avaron, F., Laforest, L., Miles, J., Gaffield, W. and Akimenko, M.-A.** (2002). Bone patterning is altered in the regenerating zebrafish caudal fin after ectopic expression of sonic hedgehog and *bmp2b* or exposure to cyclopamine. *Proc. Natl. Acad. Sci.* **99**, 8713–8718.
- 810 **Riccio, P., Cebrian, C., Zong, H., Hippenmeyer, S. and Costantini, F.** (2016). Ret and Etv4 Promote Directed Movements of Progenitor Cells during Renal Branching Morphogenesis. *PLOS Biol.* **14**, e1002382.
- Riddle, R. D., Johnson, R. L., Laufer, E. and Tabin, C. J.** (1993). Sonic hedgehog mediates the polarizing activity of the ZPA. *Cell* **75**, 1401–1416.
- 815 **Rudolf, K., Umetsu, D., Aliee, M., Sui, L., Jülicher, F. and Dahmann, C.** (2015). A local difference in Hedgehog signal transduction increases mechanical cell bond tension and biases cell intercalations along the *Drosophila* anteroposterior compartment boundary. *Development* **142**, 3845–3858.
- Sanders, T. A., Llagostera, E. and Barna, M.** (2013). Specialized filopodia direct long-range transport of SHH during vertebrate tissue patterning. *Nature* **497**, 628.
- 820 **Sato, N., Leopold, P. L. and Crystal, R. G.** (1999). Induction of the hair growth phase in postnatal mice by localized transient expression of Sonic hedgehog. *J. Clin. Invest.* **104**, 855–864.
- Saunders, J. W. and Gasseling, M. T.** (1968). Ectoderm-mesenchymal interactions in the origin of wing symmetry. *Ep. Interact.* 78–97.
- 825 **Seppala, M., Fraser, G. J., Birjandi, A. A., Xavier, G. M. and Cobourne, M. T.** (2017). Sonic Hedgehog Signaling and Development of the Dentition. *J. Dev. Biol.* **5**, 6.
- Shkumatava, A., Fischer, S., Müller, F., Strahle, U. and Neumann, C. J.** (2004). Sonic hedgehog, secreted by amacrine cells, acts as a short-range signal to direct differentiation and lamination in the zebrafish retina. *Development* **131**, 3849–3858.
- 830 **Shubin, N. H. and Alberch, P.** (1986). A morphogenetic approach to the origin and basic organization of the tetrapod limb. *Evol. Biol.* 319–387.
- Spurlin, J. W. and Nelson, C. M.** (2017). Building branched tissue structures: from single cell guidance to coordinated construction. *Philos. Trans. R. Soc. B Biol. Sci.* **372**, 20150527.

- 835 **Stewart, S., Gomez, A. W., Armstrong, B. E., Henner, A. and Stankunas, K. (2014).** Sequential and Opposing Activities of Wnt and BMP Coordinate Zebrafish Bone Regeneration. *Cell Rep.* **6**, 482–498.
- Swartz, M. E., Nguyen, V., McCarthy, N. Q. and Eberhart, J. K. (2012).** Hh signaling regulates patterning and morphogenesis of the pharyngeal arch-derived skeleton. *Dev. Biol.* **369**, 65–75.
- 840 **Testaz, S., Jarov, A., Williams, K. P., Ling, L. E., Koteliansky, V. E., Fournier-Thibault, C. and Duband, J.-L. (2001).** Sonic hedgehog restricts adhesion and migration of neural crest cells independently of the Patched- Smoothed-Gli signaling pathway. *Proc. Natl. Acad. Sci.* **98**, 12521–12526.
- Tickle, C. (2017).** An historical perspective on the pioneering experiments of John Saunders. *Dev. Biol.* **429**, 374–381.
- 845 **Wehner, D., Cizelsky, W., Vasudevaro, M. D., Özhan, G., Haase, C., Kagermeier-Schenk, B., Röder, A., Dorsky, R. I., Moro, E., Argenton, F., et al. (2014).** Wnt/ $\beta$ -Catenin Signaling Defines Organizing Centers that Orchestrate Growth and Differentiation of the Regenerating Zebrafish Caudal Fin. *Cell Rep.* **6**, 467–481.
- 850 **Woo, W.-M., Zhen, H. H. and Oro, A. E. (2012).** Shh maintains dermal papilla identity and hair morphogenesis via a Noggin–Shh regulatory loop. *Genes Dev.* **26**, 1235–1246.
- Zeng, C., Chen, T., Zhang, Y. and Chen, Q. (2017).** Hedgehog signaling pathway regulates ovarian cancer invasion and migration via adhesion molecule CD24. *J. Cancer* **8**, 786–792.
- 855 **Zhang, J., Jeradi, S., Strähle, U. and Akimenko, M.-A. (2012).** Laser ablation of the sonic hedgehog-a-expressing cells during fin regeneration affects ray branching morphogenesis. *Dev. Biol.* **365**, 424–433.
- Zuniga, A. (2015).** Next generation limb development and evolution: old questions, new perspectives. *Development* **142**, 3810–3820.

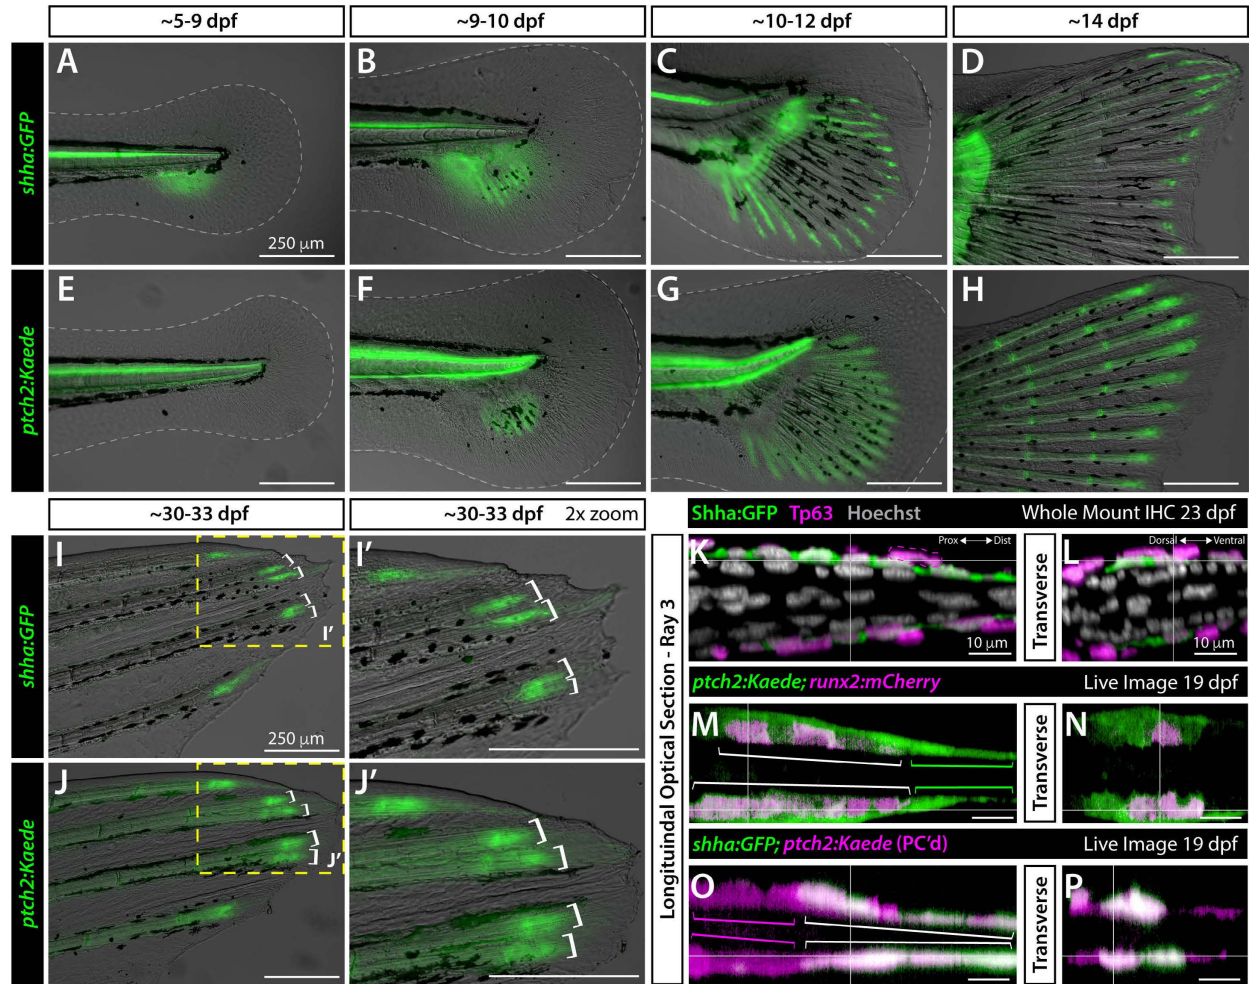

**Figure 1. Basal epidermis-expressed *shha* and *ptch2*-defined responses in basal epidermis and progenitor osteoblasts become progressively distally restricted during caudal fin development.**

5

**Figure 1. Basal epidermal *shha* and *ptch2*-defined responses in basal epidermis and progenitor osteoblasts become progressively distally restricted during caudal fin development.**

(A-J') Differential interference contrast and fluorescent overlay images of developing caudal fins of *shha:GFP* (A-D, I, I') and *ptch2:Kaede* (E-H, J, J') fish of indicated ages. White dotted lines outline the fin fold (A-F). Yellow boxes in (I, J) indicate the 2x zoom fields in (I', J'). White brackets (I-J') mark branched reporter domains in dorsal rays 2 and 3 preceding overt ray branching. (K-P) Single optical slices of caudal fin dorsal ray 3 in longitudinal (K, M, O) and transverse (L, N, P) planes derived from 3D-reconstructed whole mount confocal images of fluorescent reporter fish of indicated ages. (K, L) 23 dpf *shha:GFP* fin whole mount antibody stained for GFP (green) and the basal epidermis (bEp) marker Tp63 (magenta). The magenta dashed line outlines a representative Tp63<sup>+</sup>, GFP<sup>-</sup> cell that occasionally overlay the innermost bEp layer. Nuclei are stained with Hoechst (grey). (M-P) Single optical slice reconstructed equivalents from live whole mount-imaged 19 dpf *ptch2:Kaede;runx2:mCherry* and *shha:GFP;ptch2:Kaede* caudal fins. (M, N) *ptch2:Kaede* (green) is in distal *runx2*-marked pObs (magenta; white brackets) and a thin layer of tightly associated adjacent and further distally-extending bEps (green brackets). (O, P) *ptch2:Kaede* (photoconverted; magenta) in pObs (magenta brackets) and co-localized with *shha:GFP*-expressing bEps (green, white brackets). Scale bars are 250  $\mu\text{m}$  in (A-J') and 10  $\mu\text{m}$  in (K-P).

25

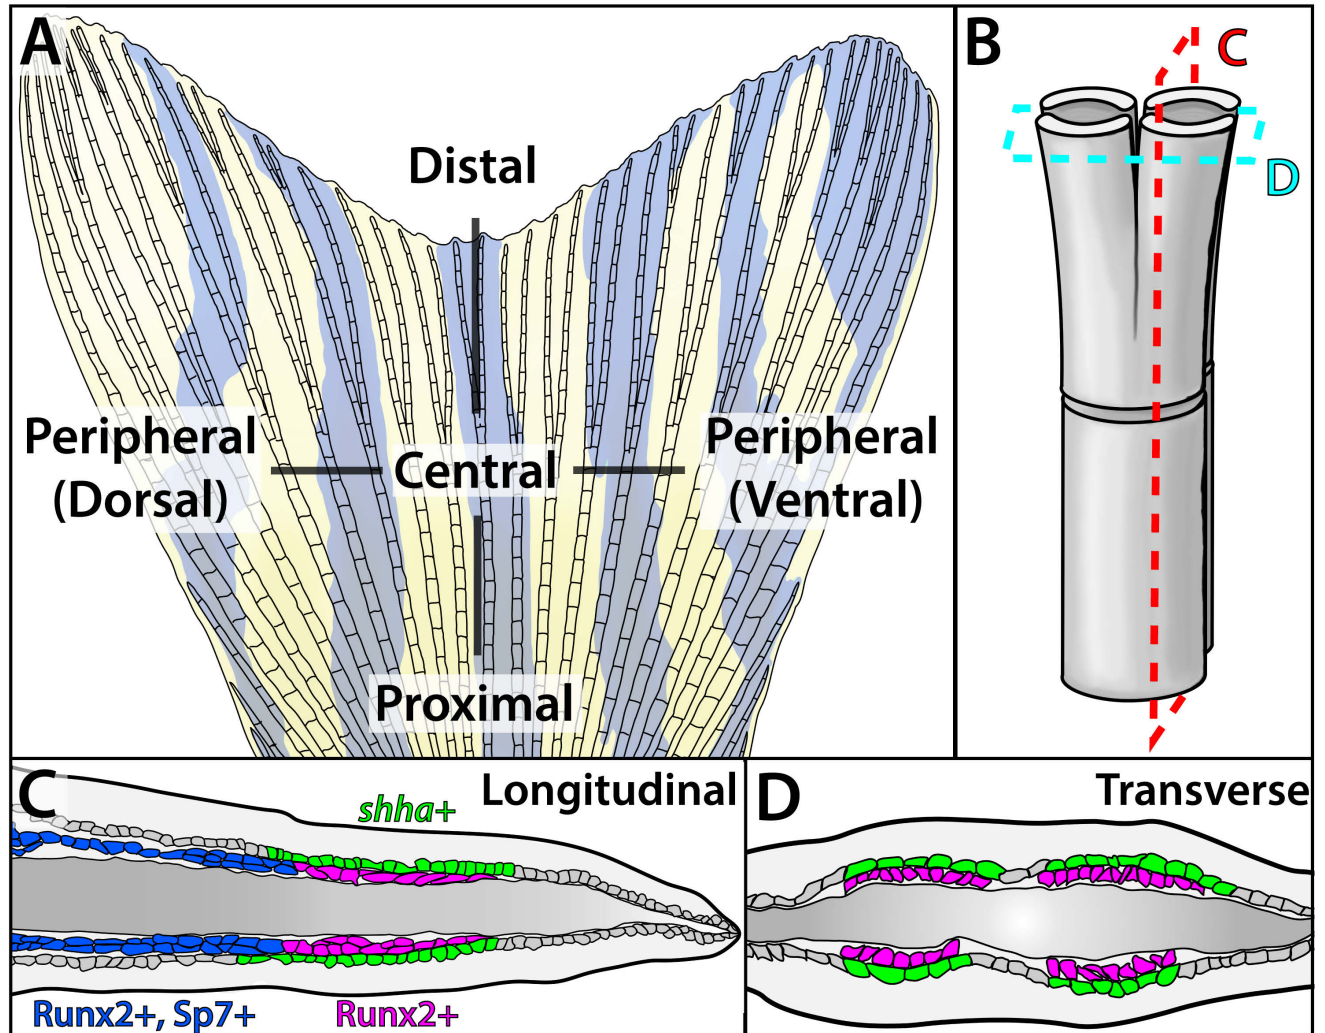

Figure 1 Supplement 1. Schematic of caudal fin skeletal anatomy.



30 **Figure 1 Supplement 1. Schematic of caudal fin skeletal anatomy.**

(A) Schematic of an adult zebrafish caudal fin. The caudal fin skeleton comprises 18 bony rays (lepidotrichia), of which the inner 16 branch at least once. (B) Cartoon rendering of a skeletal ray branch point. Two opposed hemi-cylindrical calcified hemi-rays form each ray. Branching produces two equally sized daughter rays. (C, D) Colored tracings of longitudinal (C) and  
35 transverse (D) sections through a branching lepidotrichia. Distal domains of *shha*-expressing basal epidermal cells (bEps, green) directly neighbor Runx2+ progenitor osteoblasts (pObs, magenta). Those bEps distally beyond pOb pools lose *shha* expression. *shha*+ bEp and pOb domains both split peripherally as branching initiates. As the fin extends, the distal Runx2+ pOb pool generates differentiating Runx2/Sp7+ osteoblasts (purple) that eventually mature into  
40 proximal sp7+ bone-forming cells (blue).

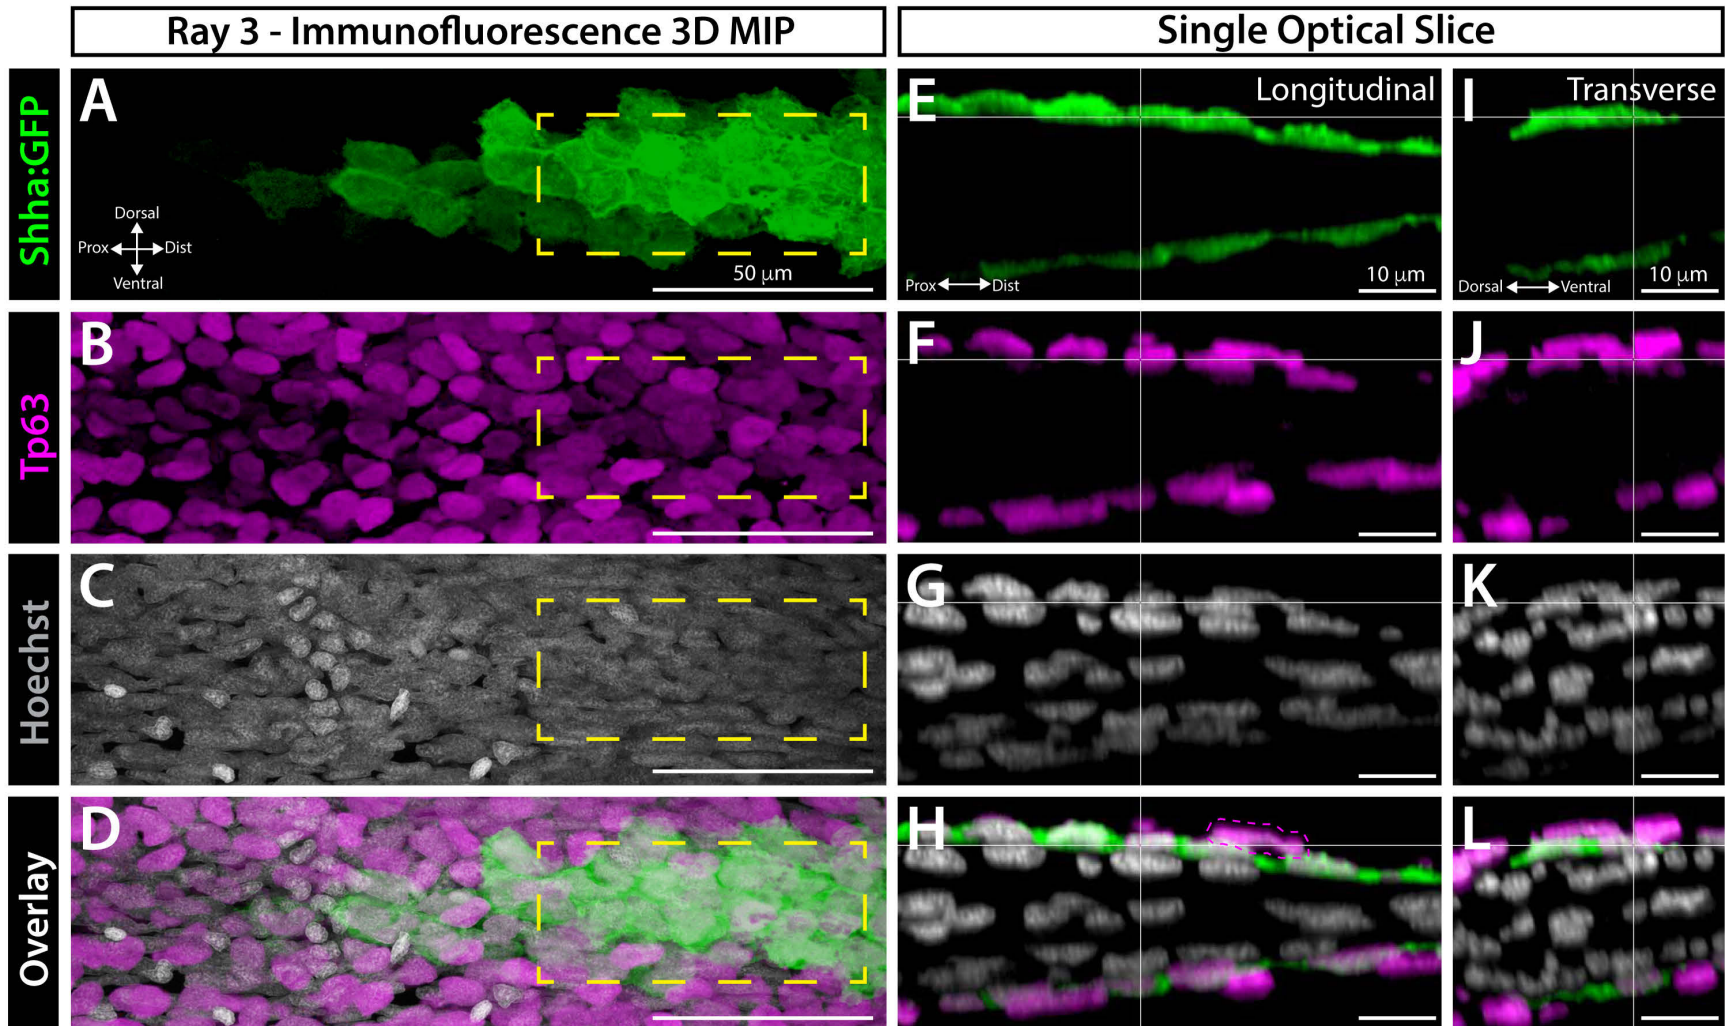

Figure 1 Supplement 2. *shha* is expressed in a single layer of distal basal epidermal cells in developing caudal fins.

**Figure 1 Supplement 2. *shha* is expressed in a single layer of distal basal epidermal cells in developing caudal fins.**

45 3D reconstructed sectional views of dorsal ray 3 from a whole mount immunostained 23 dpf *shha:GFP* caudal fin. Panels show *shha:GFP* (green, A, E, I), the basal epidermal marker Tp63 (magenta, B, F, J), Hoechst-stained nuclei (Hoechst, C) and overlays (D, H, L; H, L are reproduced in main Figure 1). (A-D) Maximum intensity projection (MIP) of the “native” frontal view. (E-L) Reconstructed single optical slice equivalents showing longitudinal (E-H) and  
50 transverse (I-L) planar views of the dashed yellow boxed regions in (A-D). *Shha:GFP* cells define the innermost basal epidermal cell layer and all co-express Tp63. An occasional single-positive Tp63+ bEps (representative cell in magenta dashed lines, H) is found in a second, outer layer of bEps. Scale bars and orientations are indicated.

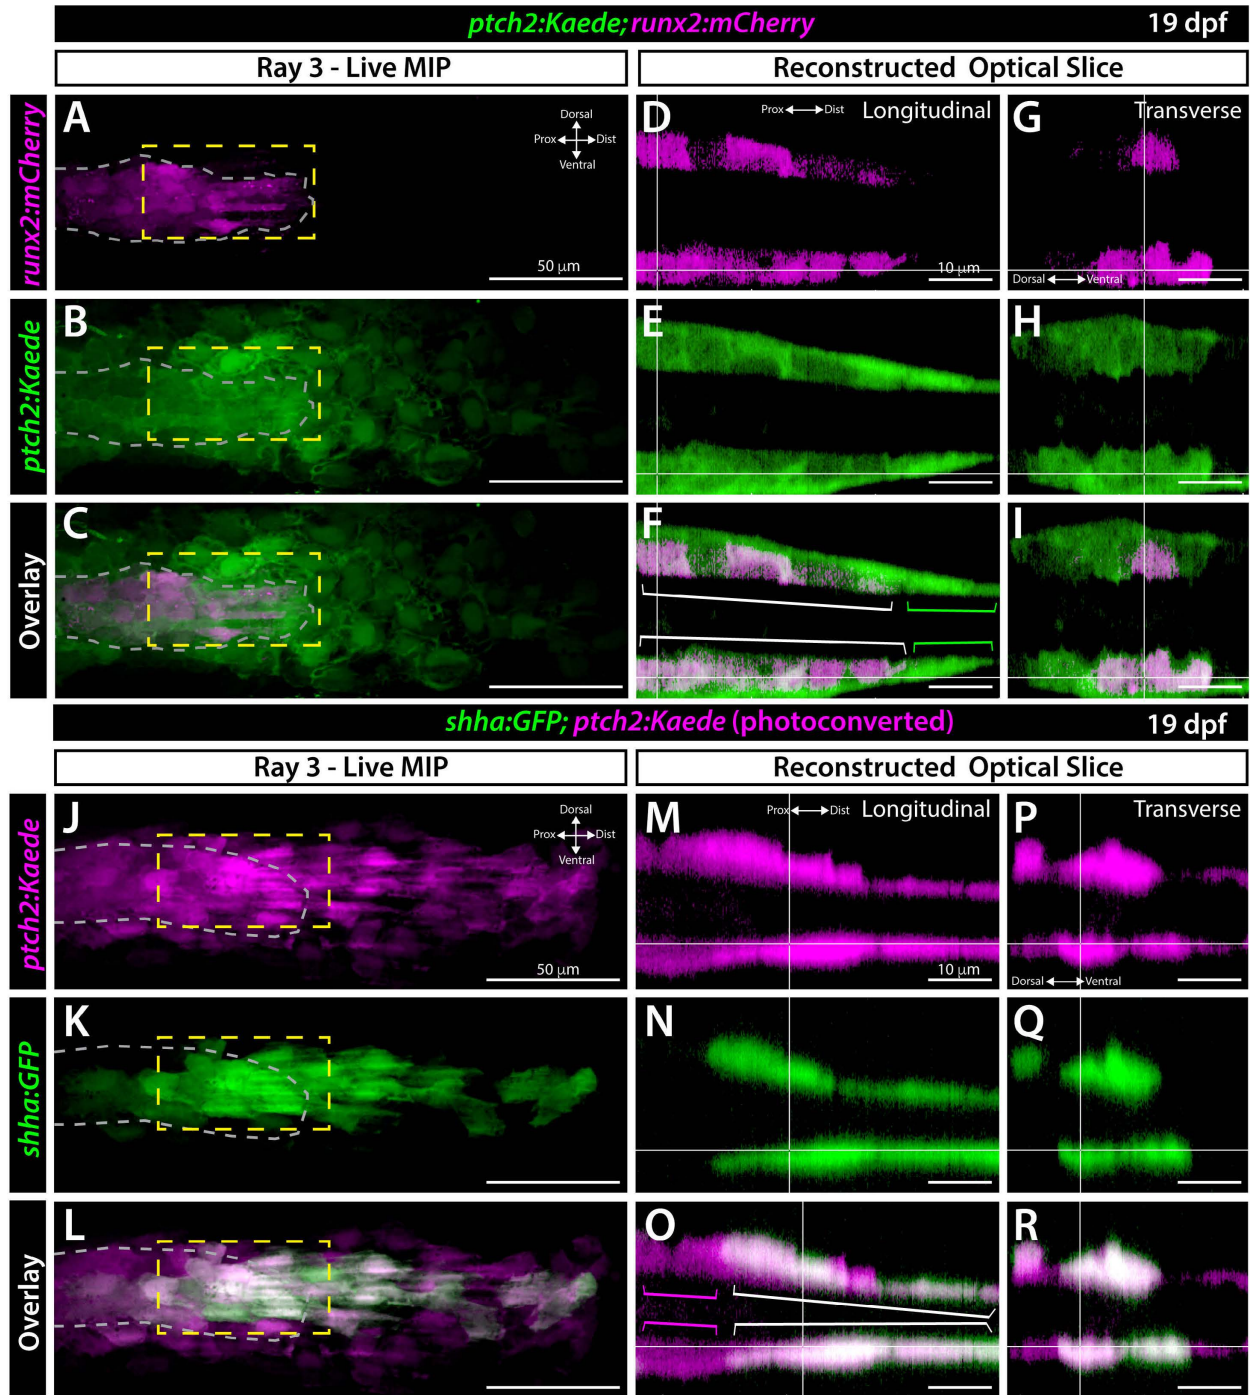

55 **Figure 1 Supplement 3. *ptch2* is expressed in tightly-associated layers of distal basal epidermal cells and progenitor osteoblasts in developing caudal fins.**

**Figure 1 Supplement 3. *ptch2* is expressed in tightly-associated layers of distal basal epidermal cells and progenitor osteoblasts in developing caudal fins.**

60 (A-I) Whole mount confocal imaging of dorsal ray 3 from a live 19 dpf *ptch2:Kaede*;  
*runx2:mCherry* caudal fin. (A-C) Maximum intensity projection (MIP) of a frontal view. The  
progenitor osteoblast (pObs) pool is outlined with grey dashed lines. *runx2:mCherry*-marked  
pObs are in magenta (A) and *ptch2:Kaede* is in green (B). The overlay is shown in (C). (D-I)  
Reconstructed optical slice views of the region marked by yellow dashed lines in A-C. Overlays  
65 (F, I; reproduced in main Figure 1) show relatively proximal regions of *ptch2:Kaede* and  
*runx2:mCherry*<sup>+</sup> co-expressing pObs (white brackets) and an adjacent thin layer of  
*ptch2:Kaede*<sup>+</sup> basal epidermal cells (bEps). These bEps extend further distally from the pOb  
pool (green brackets). (J-R) Confocal images of dorsal ray 3 from a 19 dpf  
*shha:GFP;ptch2:Kaede* caudal fin in which the Kaede protein has been photoconverted from  
70 green to red fluorescence emission. (J-L) Frontal view MIP with osteoblast-populated region  
outlined with grey dashed lines. *shha:GFP* bEps (green) co-express *ptch2:Kaede* (magenta). (M-  
R) Reconstructed optical slices of the yellow dashed boxes in J-L. Overlays (O, R; reproduced in  
main Figure 1) demonstrate proximal regions contain single-positive *ptch2:Kaede*<sup>+</sup> pObs  
(magenta brackets) whereas distal regions include co-expressing *shha:GFP* and *ptch2:Kaede*  
75 bEps (white brackets). Scale bars are 50  $\mu$ m in A-C, J-L and 10  $\mu$ m in D-I, M-R.

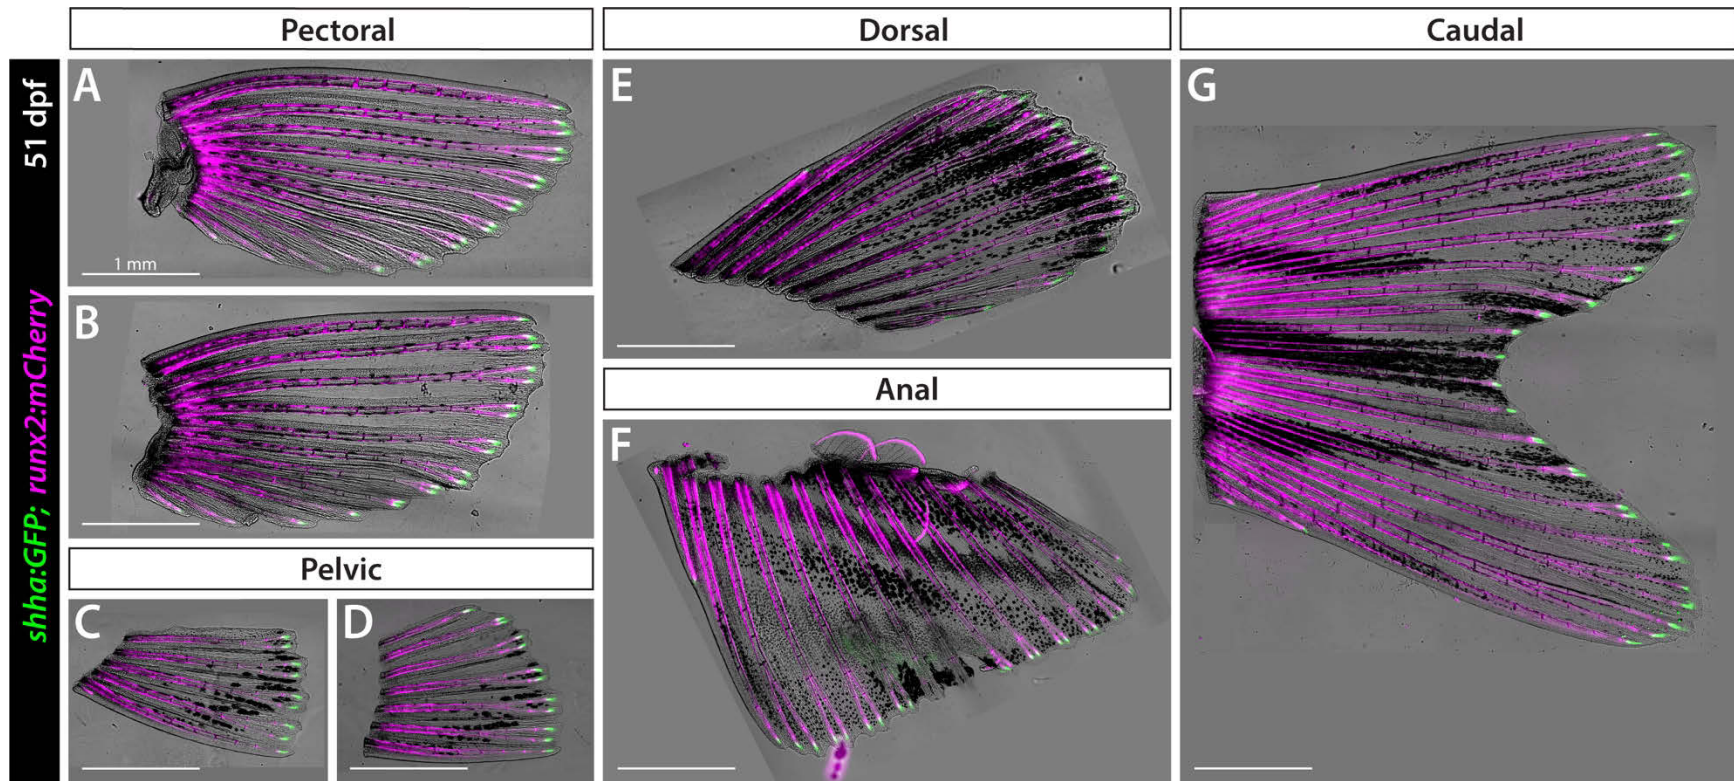

Figure 1 Supplement 4. Distal *shha* expression is conserved across developing fins.

**Figure 1 Supplement 4. Distal *shha* expression is conserved across developing fins.**

Dissected fins from a representative 51 dpf *shha:GFP;runx2:mCherry* fish. Zebrafish have 7 fin  
80 appendages: the paired pectoral (A, B) and pelvic (C, D) fins and unpaired dorsal (E), anal (F),  
and caudal (F) fins. All have branched rays marked by *runx2:mCherry* (magenta) with  
*shha:GFP*<sup>+</sup> domains (green) at the distal end of each developing ray. All images are  
brightfield/GFP/mCherry overlays and sized to the same scale (1 mm scale bars).

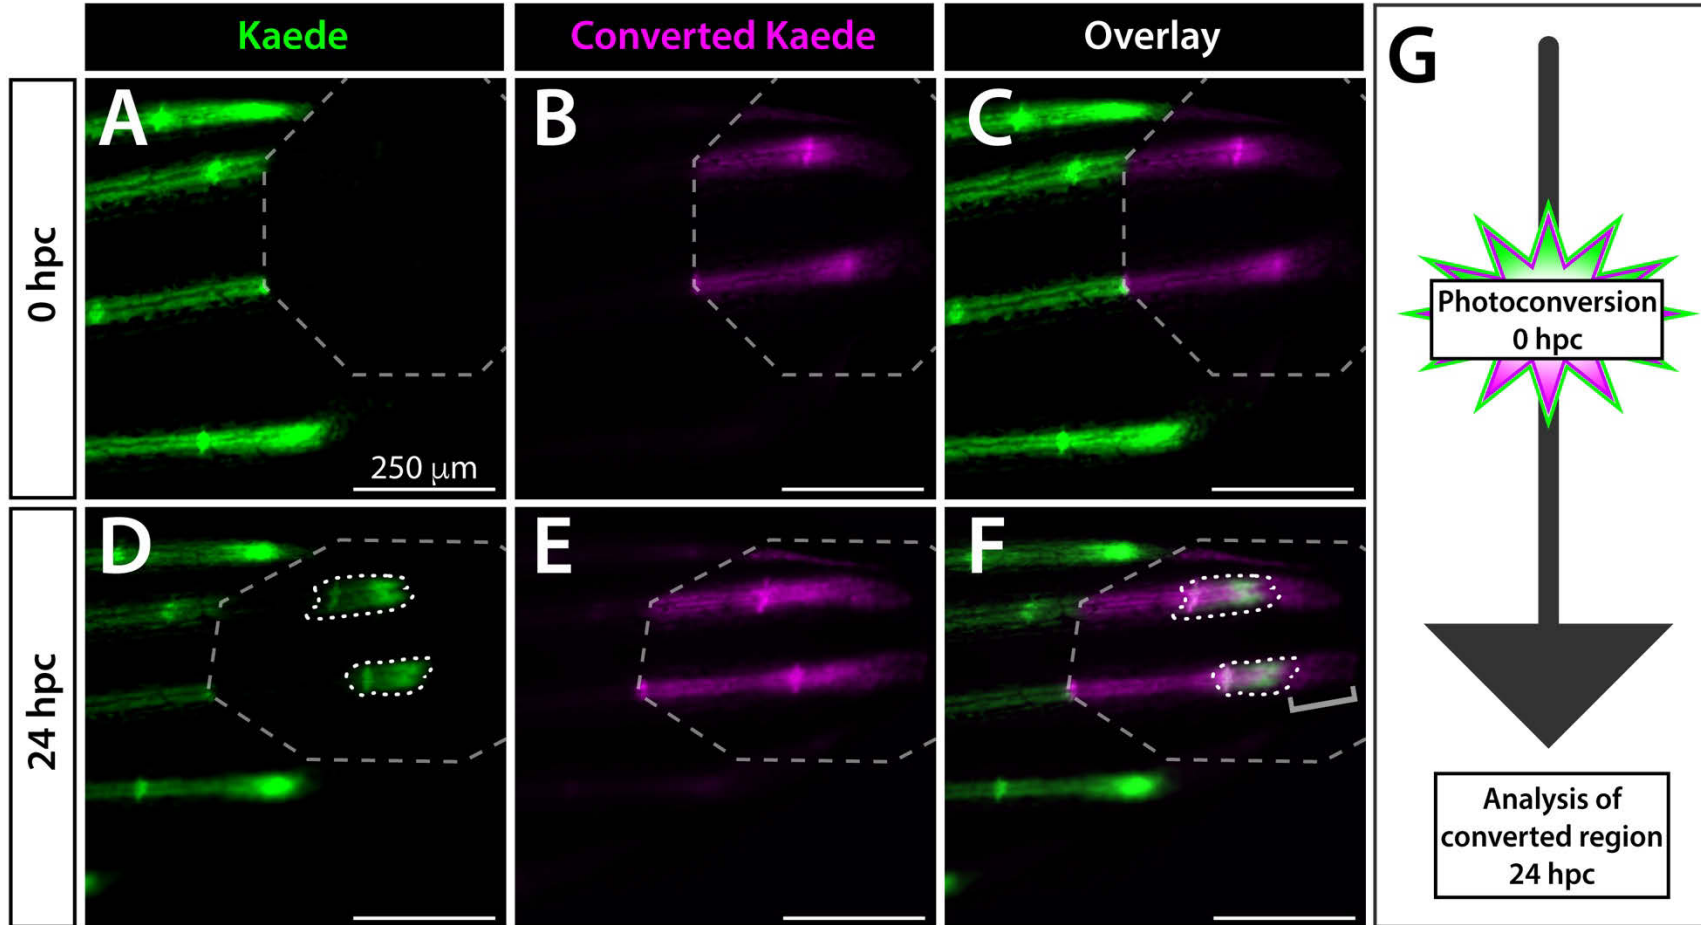

85 **Figure 2. Active Shh/Smo signaling is restricted to a narrow distal stretch of each developing fin ray.**



**Figure 2. Active Shh/Smo signaling is restricted to a narrow distal stretch of each developing fin ray.**

(A-F) Whole mount fluorescent images of the distal aspect of the caudal fin of a 25 dpf  
90 *ptch2:Kaede* larval fish at the time of Kaede photoconversion from green to red (false colored  
magenta) fluorescence (0 hpc, A-C) and 24 hours later (24 hpc, D-F). The grey dashed octagon  
marks the photoconverted region of interest (ROI). The 0 hpc overlay (C) demonstrates complete  
Kaede photoconversion. The same fish imaged at 24 hpc displays a small patch of newly  
produced green Kaede (white dotted outlines in D, F) within the photoconverted ROI. The grey  
95 bracket in (F) marks distally displaced bEps retaining photoconverted Kaede. Slight splitting of  
the new green Kaede domain (D, F) indicates the onset of ray branching. (G) Schematic of the  
photoconversion time course. The fish shown is representative of  $n=8$ . Scale bars are 250  $\mu\text{m}$ .

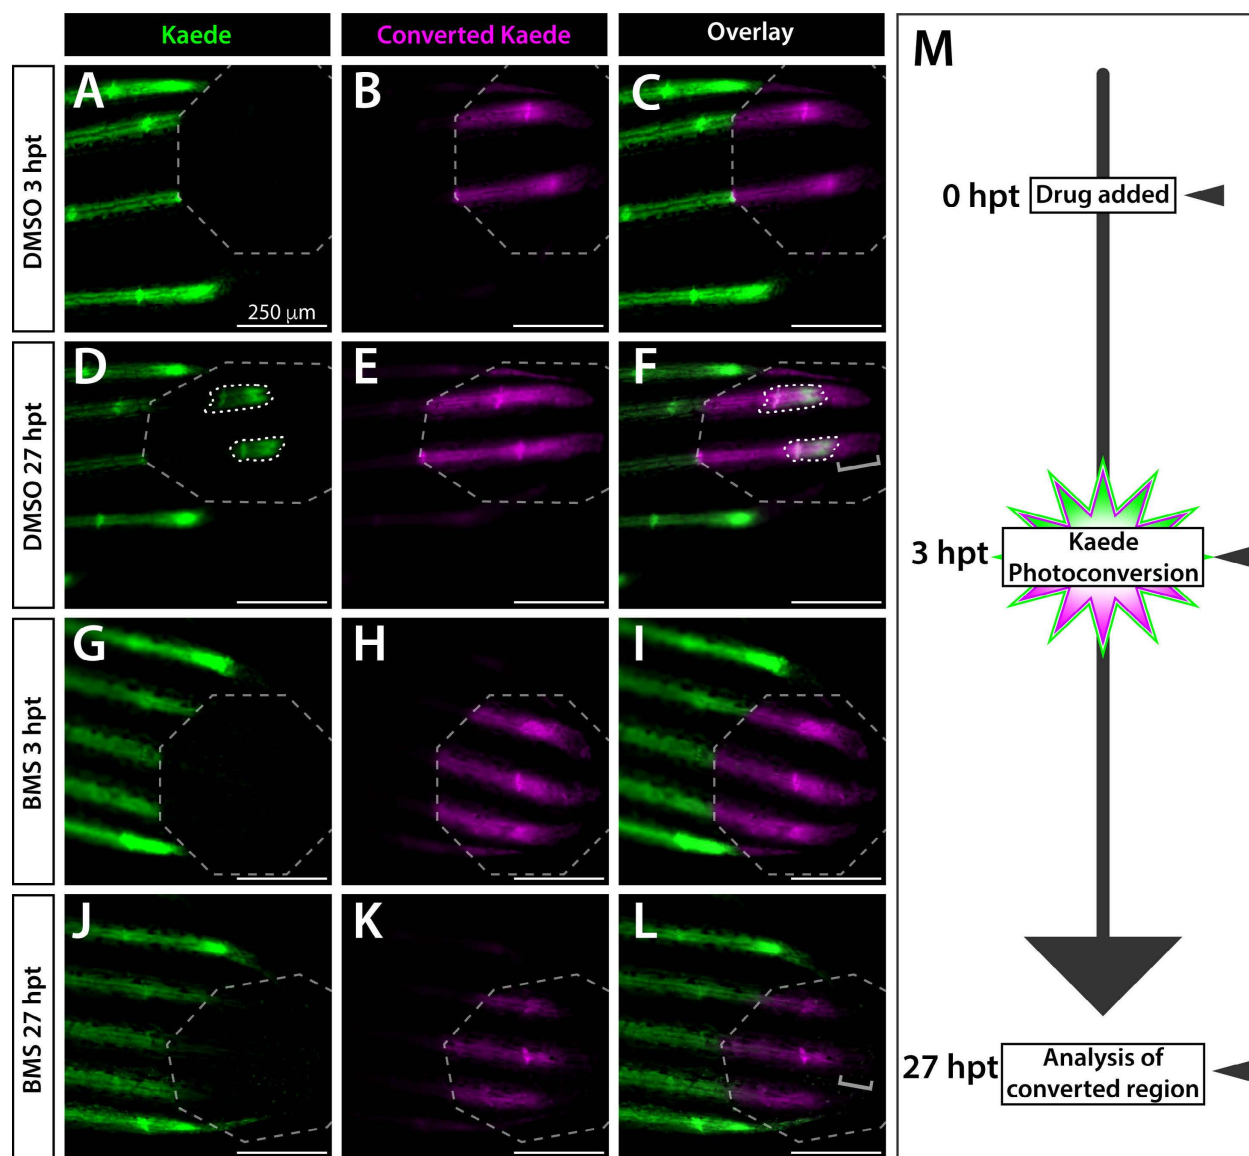

Figure 2 Supplement 1. BMS-833923 inhibits Shh/Smo signaling in developing caudal fins.

100 **Figure 2 Supplement 1. BMS-833923 inhibits Shh/Smo signaling in developing caudal fins.**

Expanded data from Figure 2. (A-L) Whole mount fluorescence images of the distal caudal fin of 25 dpf *ptch2:Kaede* fish treated with DMSO (A-F) or BMS-833923 (BMS; G-L), imaged at the time of Kaede photoconversion (3 hours post treatment (hpt)) and 24 hours later (27 hpt). Grey dashed octagons mark the photoconverted regions of interest (ROIs). BMS exposure prevented  
105 production of new green fluorescent Kaede within the ROI (J-L). Brackets mark presence or absence of photoconverted basal epidermal cells (bEps) that migrated distally over the 24 hour “chase”. These cells are missing in BMS-treated fish, likely due to accelerated movement and therefore shedding. The few green Kaede<sup>+</sup> basal epidermal cells in (J, L) migrated into the photoconverted region without producing new Kaede. (M) Schematic of the time course for drug  
110 treatments, photoconversion, and imaging. Imaged fish represent groups of  $n=8$ . Scale bars are 250  $\mu\text{m}$ .

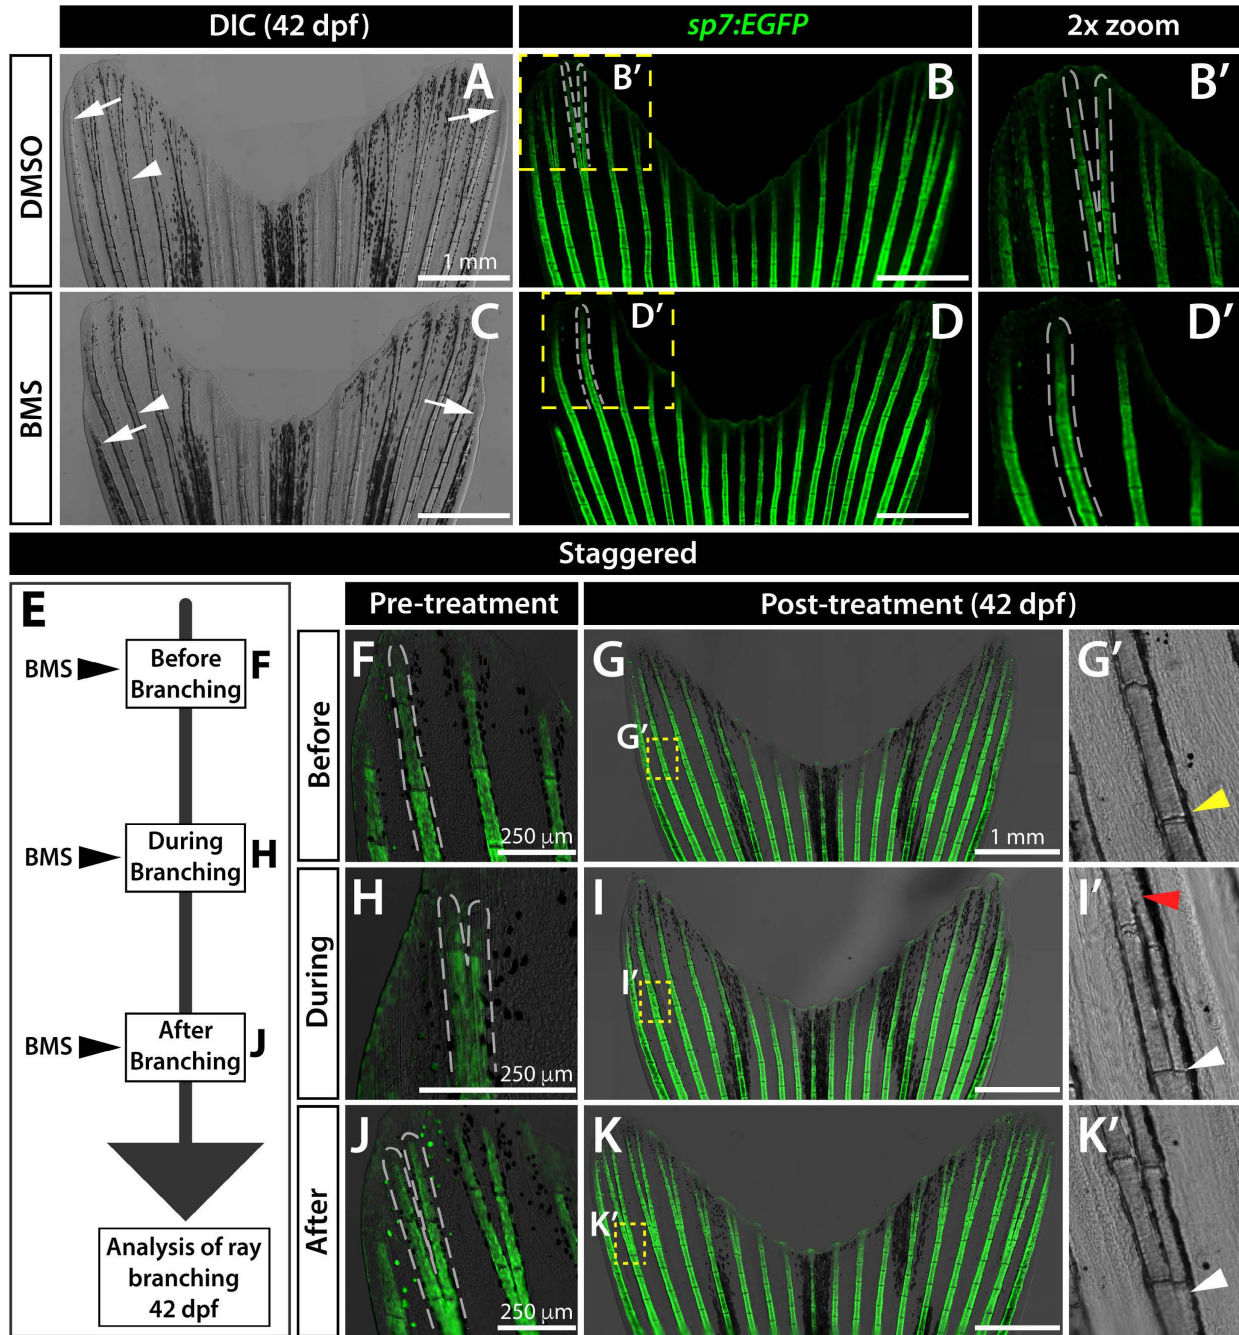

**Figure 3. Sustained Shh/Smo signaling is required for ray branching in developing caudal fins.**

**Figure 3. Sustained Shh/Smo signaling is required for ray branching in developing caudal fins.**

(A-D) Differential interference contrast (DIC) and fluorescence images of caudal fins from DMSO (A, B) and BMS-833923 (BMS)-treated (C, D) 42 dpf *sp7:EGFP* osteoblast reporter fish. Dashed white lines outline dorsal ray 3 and daughter rays, when present. White arrowheads designate a present (A) or absent (B) branch point. White arrows mark ends of the principal peripheral rays. (E-K) Experimental schematic of (E) and resulting caudal fin images of 42 dpf *sp7:EGFP* fish from (F-K') staggering the start of BMS treatment to before (F-G'), during (H-I'), and after branch initiation (J-K'). Yellow dashed boxes outline dorsal ray 2 regions shown in (G', I' and K'). The yellow arrowhead in (G') designates where branching would have occurred without Shh/Smo-inhibition. The red arrowhead in (I') marks where a ray re-fused when BMS was added after branching had initiated. White arrowheads in (I' and K') indicate ray branch points. Images represent treatment groups (before, during, and after) of  $n=4$  or 5 BMS-treated and  $n=2$  or 3 DMSO controls. Ray re-fusions occur in 4 of 5 fish treated with BMS “during” ray branching. Scale bars are 250  $\mu\text{m}$  or 1 mm, as indicated.

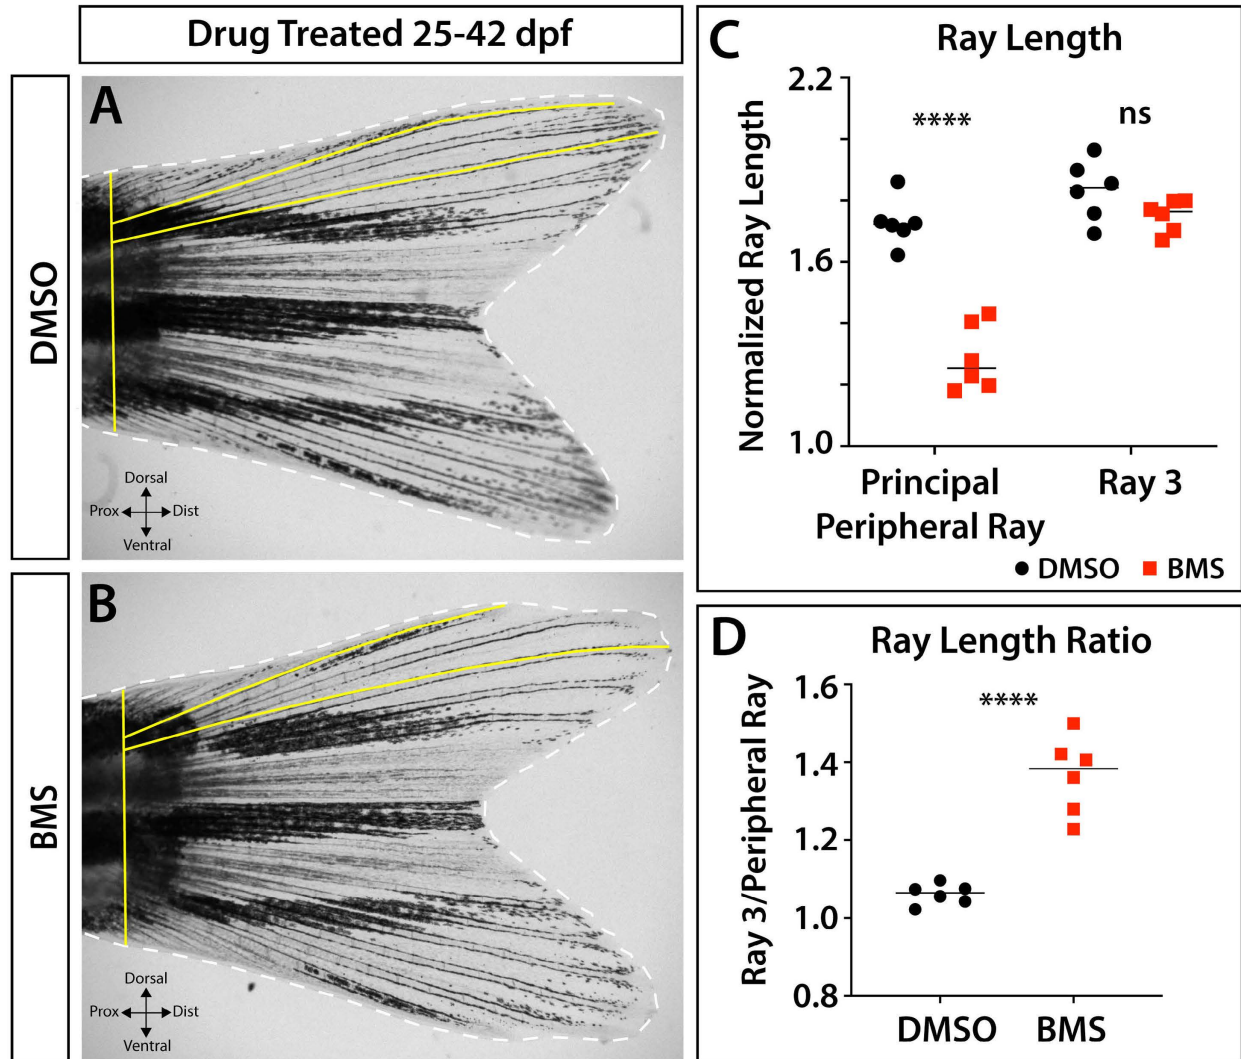

**Figure 3 Supplement 1. Shh/Smo signaling contributes to principal peripheral ray outgrowth.**

135 **Figure 3 Supplement 1. Shh/Smo signaling contributes to principal peripheral ray  
outgrowth.**

Whole mount caudal fin images of (A) DMSO- and (B) BMS-treated juvenile fish (exposed from 25-42 days post fertilization (dpf)) and (C) graphs of ray morphometrics. Yellow lines indicate measured ray lengths and fin widths. Dorsal ray 3 does not significantly differ in length between  
140 treatment groups ( $p = 0.09$ ). In contrast, the non-branching principal peripheral ray 1 is uniquely shorter in BMS-treated versus DMSO control fish ( $p < 0.0001$ ). As such, the ray length ratio between ray 3 and principal peripheral ray 1 is higher in BMS-treated fish ( $p < 0.0001$ ). Images are representatives of experimental groups of  $n=6$ . Ray length measurements are from the base of the fin and are normalized to fin width. Statistical significance was determined using  
145 Student's unpaired t-tests.

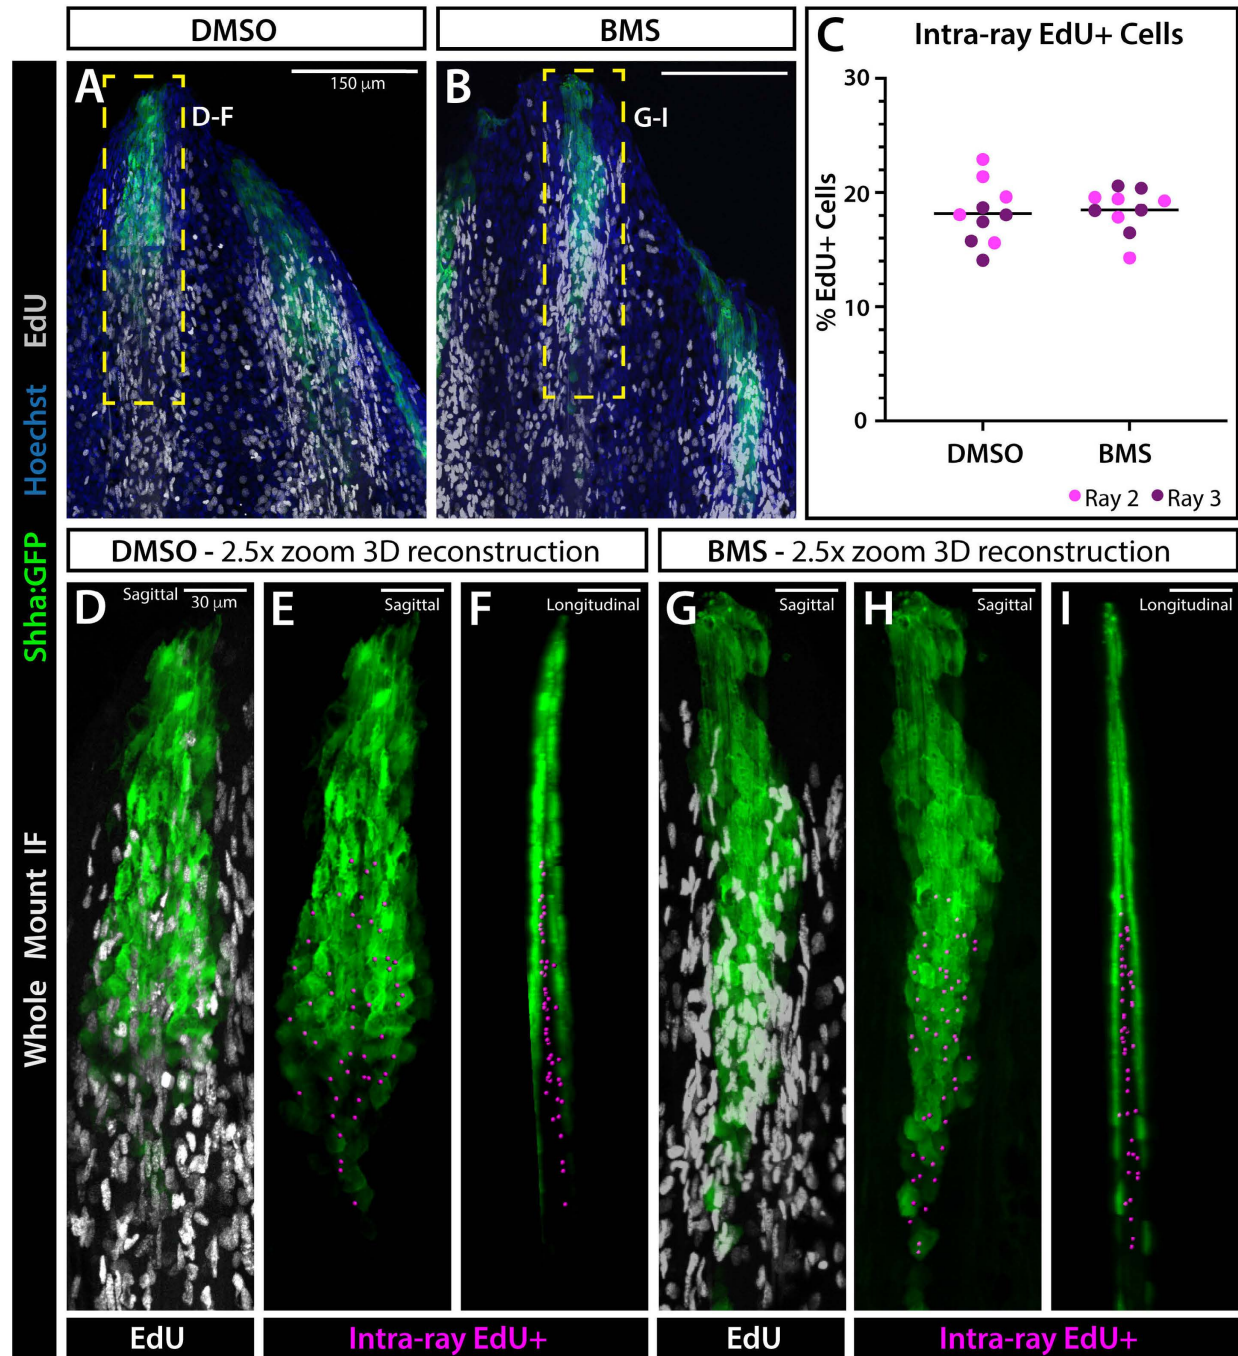

Figure 3 Supplement 2. Shh/Smo signaling does not impact proliferation in developing fins.



**Figure 3 Supplement 2. Shh/Smo signaling does not impact proliferation in developing fins.**

150

(A, B) Confocal maximum intensity projection images of whole mount immunostained 29 dpf developing *shha:GFP* caudal fins. Fish were treated with DMSO (A) or BMS-833923 (BMS) (B) for 4 hours, IP injected with EdU, returned to drug, and fins harvested 12 hours later. GFP is in green, Hoechst nuclear stain in blue, and EdU as detected with Click-iT Plus in white. (C)

155

Scatter plot graph showing the percent of intra-ray EdU+ cells, i.e. those located in between the epidermal Shh domains of each hemi-ray, does not significantly differ between DMSO controls and BMS-treated fish.  $n=5$  for each group. (D-I) 3D reconstructions of ray 3 domains marked by yellow dashed boxes in (A, B). (D, G) Overlay of GFP and EdU, sagittal view. (E, H) GFP with magenta spheres marking EdU+ cells located within the intra-ray space, detected and quantified

160

with Imaris software. (F, I) Longitudinal view of (E, H). Intra-ray EdU+ cells are located in between Shh+ domains with epidermal cells excluded from automated scoring. Scale bars are 150  $\mu\text{m}$  or 30  $\mu\text{m}$ , as indicated.

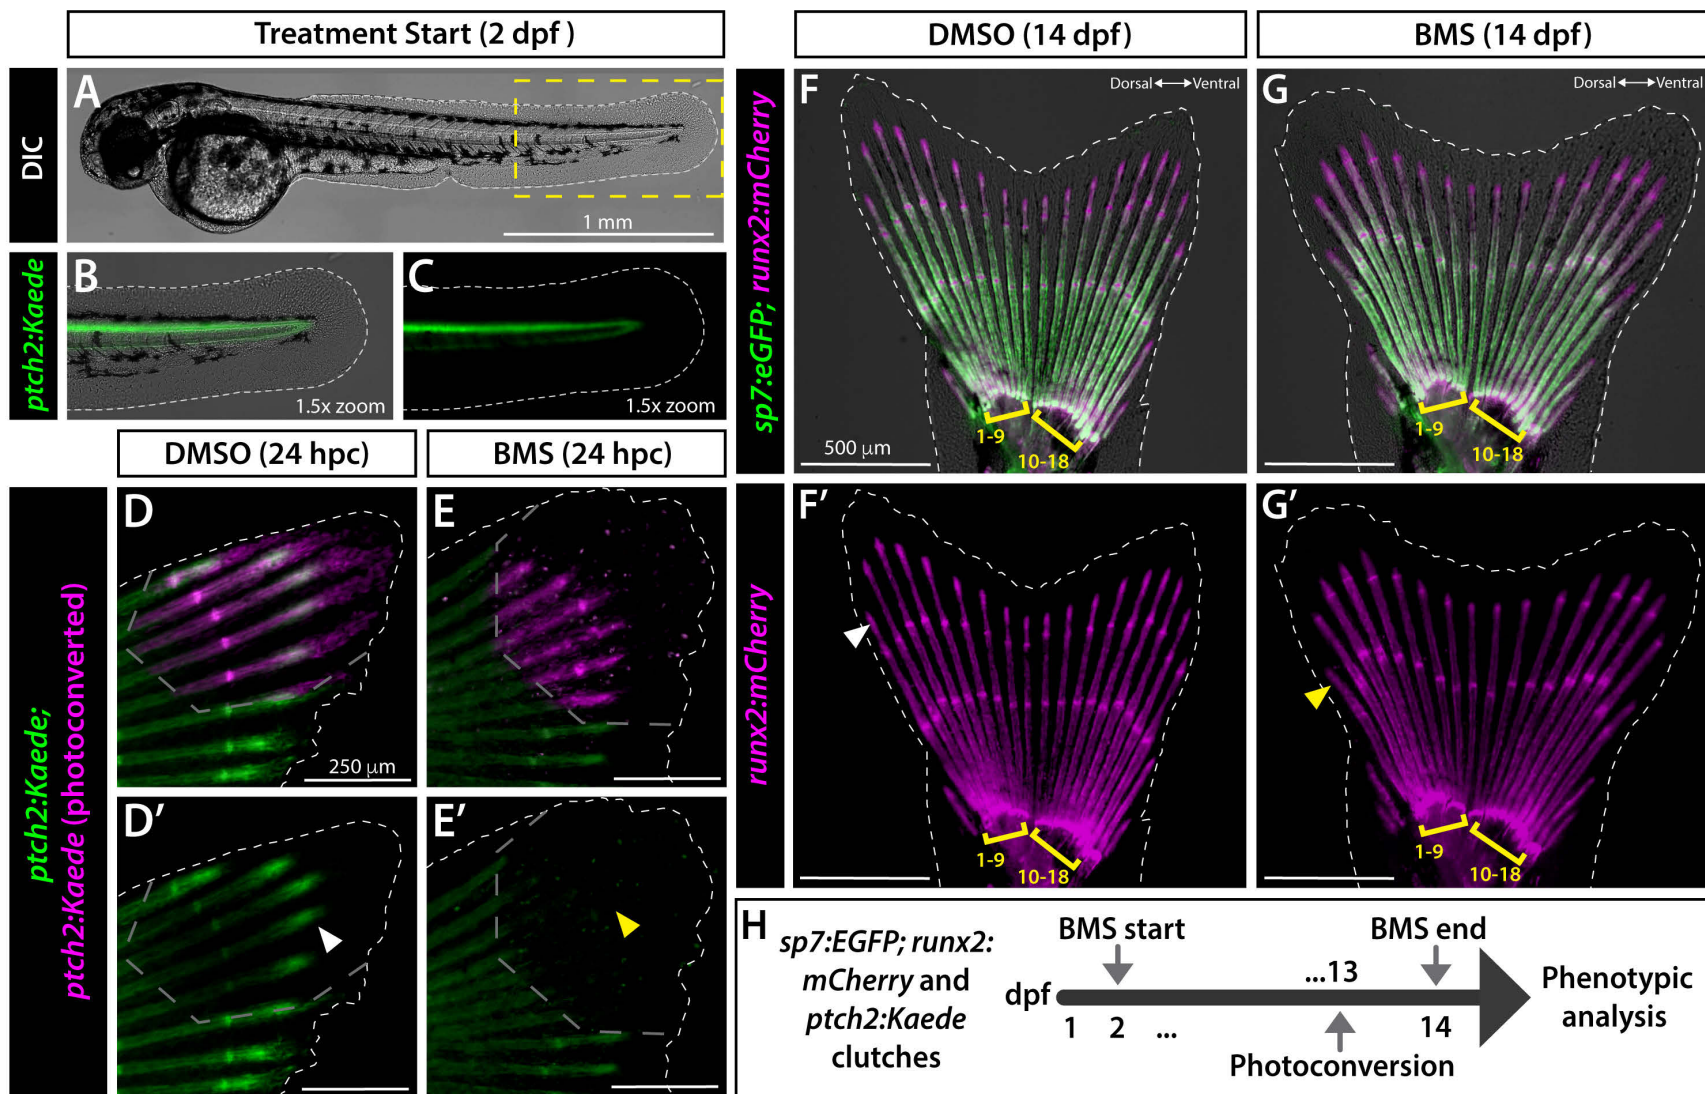

Figure 3 Supplement 3. Shh/Smo signaling does not influence initial caudal fin patterning.

165 **Figure 3 Supplement 3. Shh/Smo signaling does not influence initial caudal fin patterning.**

(A-C) Whole mount differential interference contrast (DIC) and/or fluorescence images of a 2 dpf *ptch2:Kaede* embryo. The dashed yellow box marks the 1.5x zoomed region shown in (B, C). The primordial fin fold lacks rays or structural ray precursors. *ptch2:Kaede* expression is restricted to the notochord and does not expand into the fin fold. (D-E'). *ptch2:Kaede* larvae treated with DMSO or BMS-833923 (BMS) from 2 dpf, photoconverted distal fin regions at 13 dpf (grey dashed lines), and imaged 24 hours later ( $n=3-5$  per group). BMS treatment blocked production of new green Kaede (yellow arrowhead, E') compared to controls (white arrowhead, D'). (F-G') Whole mount fluorescence images of *sp7:EGFP;runx2:mCherry* larvae treated with DMSO (F) or BMS (G) from 2-14 dpf. Both groups have caudal fins with the standard complement of 18 segmented rays, with 9 rays each on the dorsal and ventral lobes (yellow brackets). BMS-treated fins exhibit shortened principal peripheral rays (yellow arrowhead, G') compared to DMSO controls (white arrowhead, F').  $n=33$  DMSO- and  $n=44$  BMS-treated larvae from 2-14 dpf. Scale bars are 1 mm, 250  $\mu\text{m}$ , or 500  $\mu\text{m}$ , as marked.

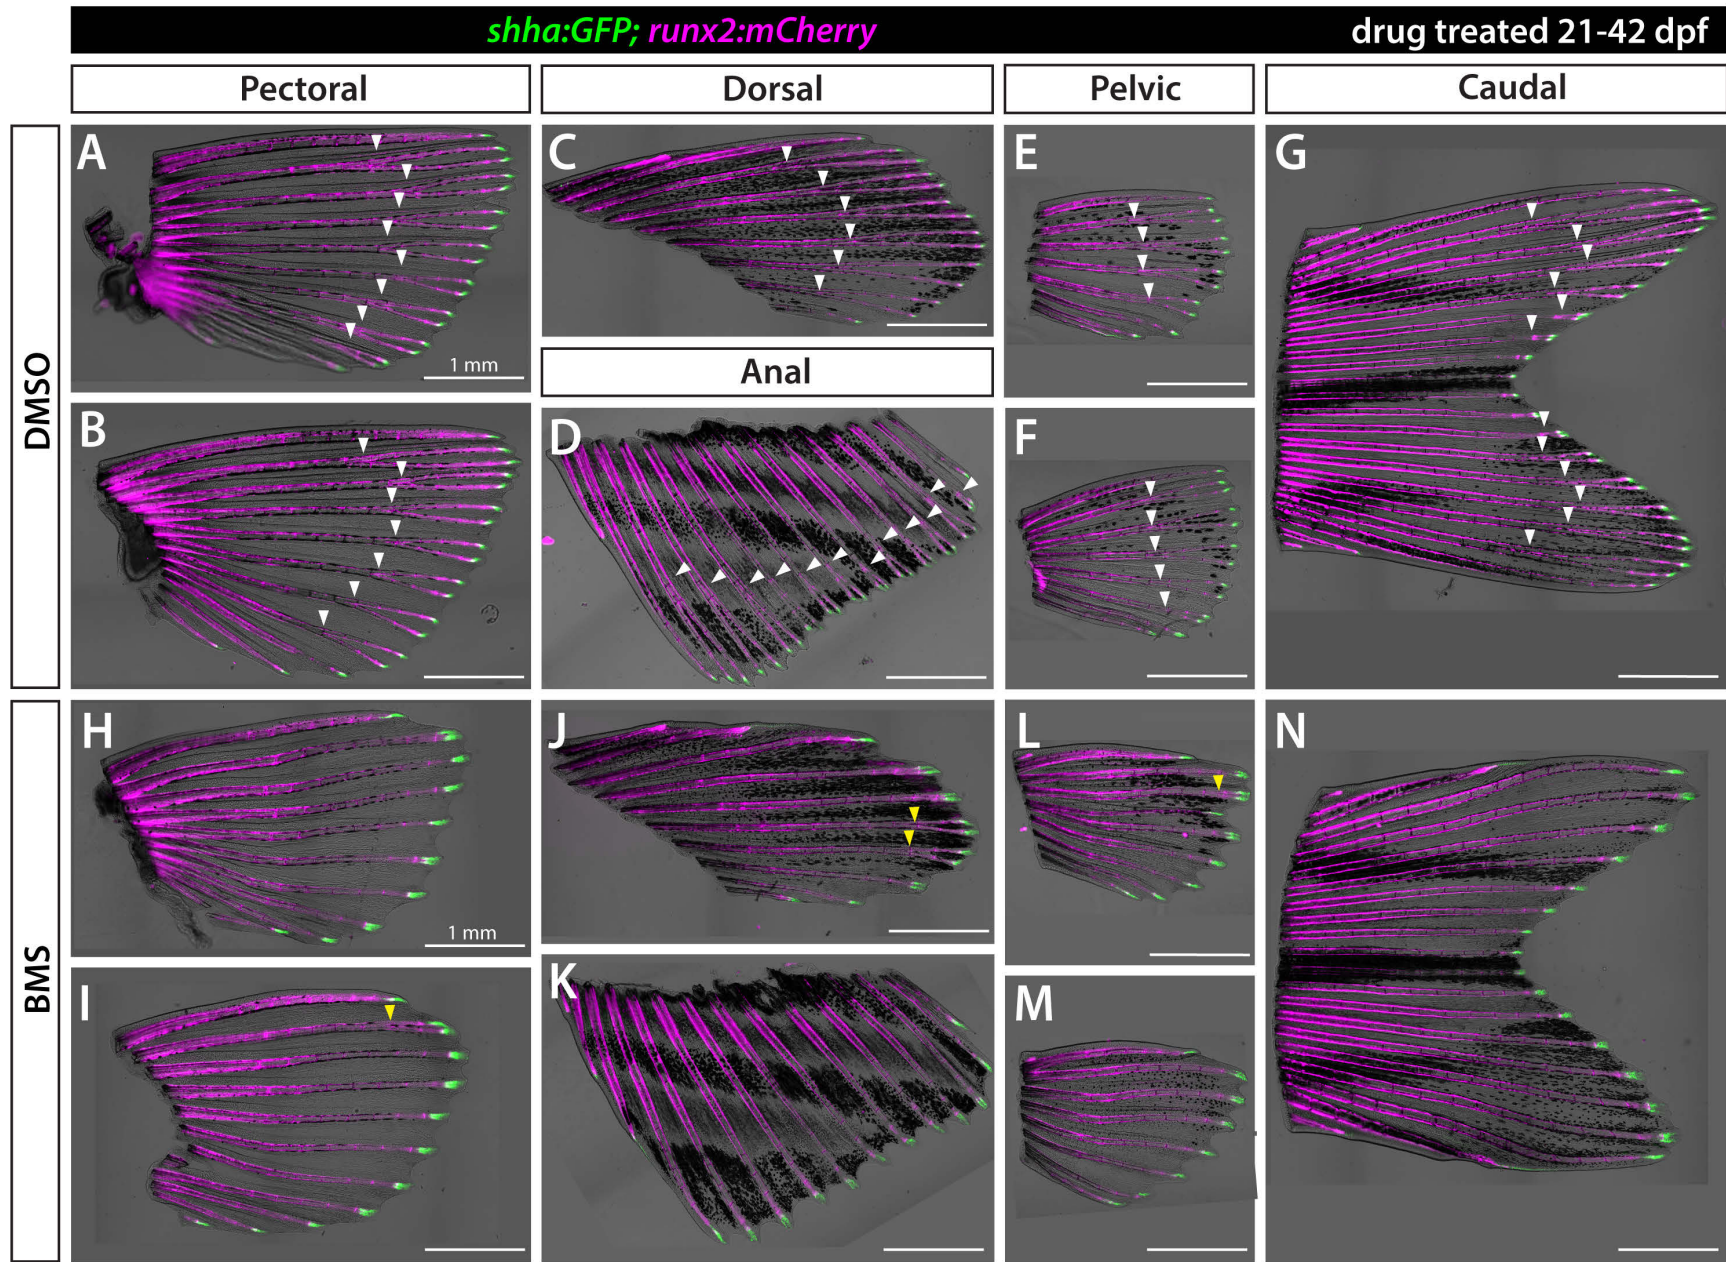

**Figure 4. Shh/Smo signaling promotes ray branching in all paired and unpaired fins.**

180 **Figure 4. Shh/Smo signaling promotes ray branching in all paired and unpaired fins.**

Brightfield and fluorescence overlay images of isolated fins from *shha:GFP;runx2:mCherry* juvenile fish treated with DMSO (A-G) or 1.25  $\mu$ M BMS-822923 (BMS; H-N) from 21-42 dpf. *runx2:mCherry*-labeled rays branch (white arrowheads) in all fins whereas rays of BMS-treated fish mostly fail to branch or have severely delayed branching (yellow arrowheads). *shha:GFP+*  
185 basal epidermal cells are restricted to distal ray tips under both conditions.  $n=6$  for each group.

Scale bars are 1 mm.

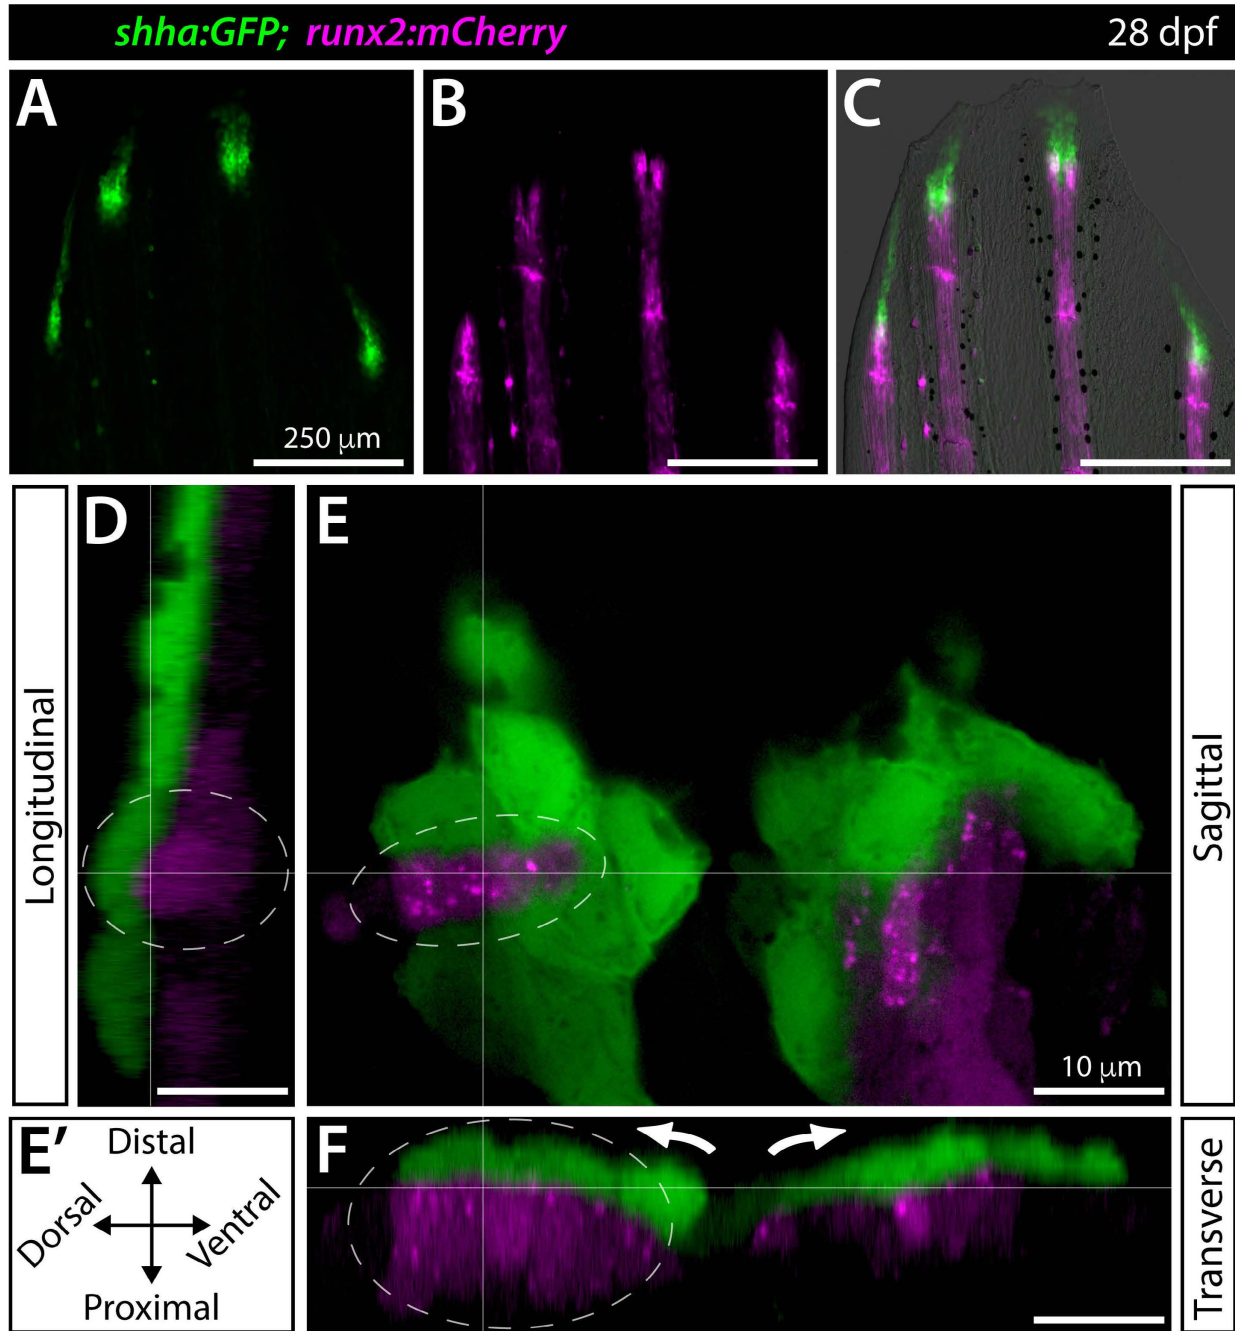

**Figure 5. Shha+ bEps and pObs are intertwined in developing fins.**

**Figure 5. Shha+ bEps and pObs are intertwined in developing fins.**

(A-F) Fluorescence widefield (A-C) or confocal (D-F) images of the dorsal caudal fin lobe of a 28 dpf *shha:GFP;runx2:mCherry* fish. (A-C) *shha:GFP*-expressing basal epidermal cells (green) overlay and extend distally from *runx2:mCherry*-high progenitor osteoblasts (magenta; pObs). The overlay in (C) includes a brightfield image for context. (D-F) A single optical slice (E; sagittal; orientation key in E') and reconstructed longitudinal (D) and transverse (F) views of a distal ray region undergoing ray branching. *shha:GFP*+ bEps (green) and *runx2:mCherry*+ pObs (magenta) have overlapping signal at interfaces, indicating their tight juxtaposition. bEps and pObs tandemly separate into split pools during branching (white arrows). The grey dotted oval highlights a ridge of pObs nestled into a *shha:GFP*+ bEp groove (Movie 2). Scale bars are 250  $\mu\text{m}$  (A-C) and 10  $\mu\text{m}$  (D-F).

**Figure 5 Movie 1.** A dynamic 3-D visualization of confocal-imaged caudal fin dorsal ray 3 from a 28 dpf *shha:GFP;runx2:mCherry* fish. *shha:GFP*+ bEps (green) of both hemi-rays are beginning to branch. Underlying pObs (magenta) are pressed against bEps. 3D reconstruction of live confocal microscopy. Surfaces added with Imaris to visualize domain boundaries.

**Figure 5 Movie 2.** 3-D space exploration of the distal region of a confocal-imaged caudal fin hemi-ray from a 28 dpf *shha:GFP;runx2:mCherry* fish. The *shha:GFP*+ bEp (green) domain has started splitting ahead of ray branching. A ridge of pObs (magenta) is nestled in a hollow of *shha:GFP*+ bEps. Imaris-generated surfaces help visualize domain boundaries. Single optical slices of the same region are shown in Figure 5.

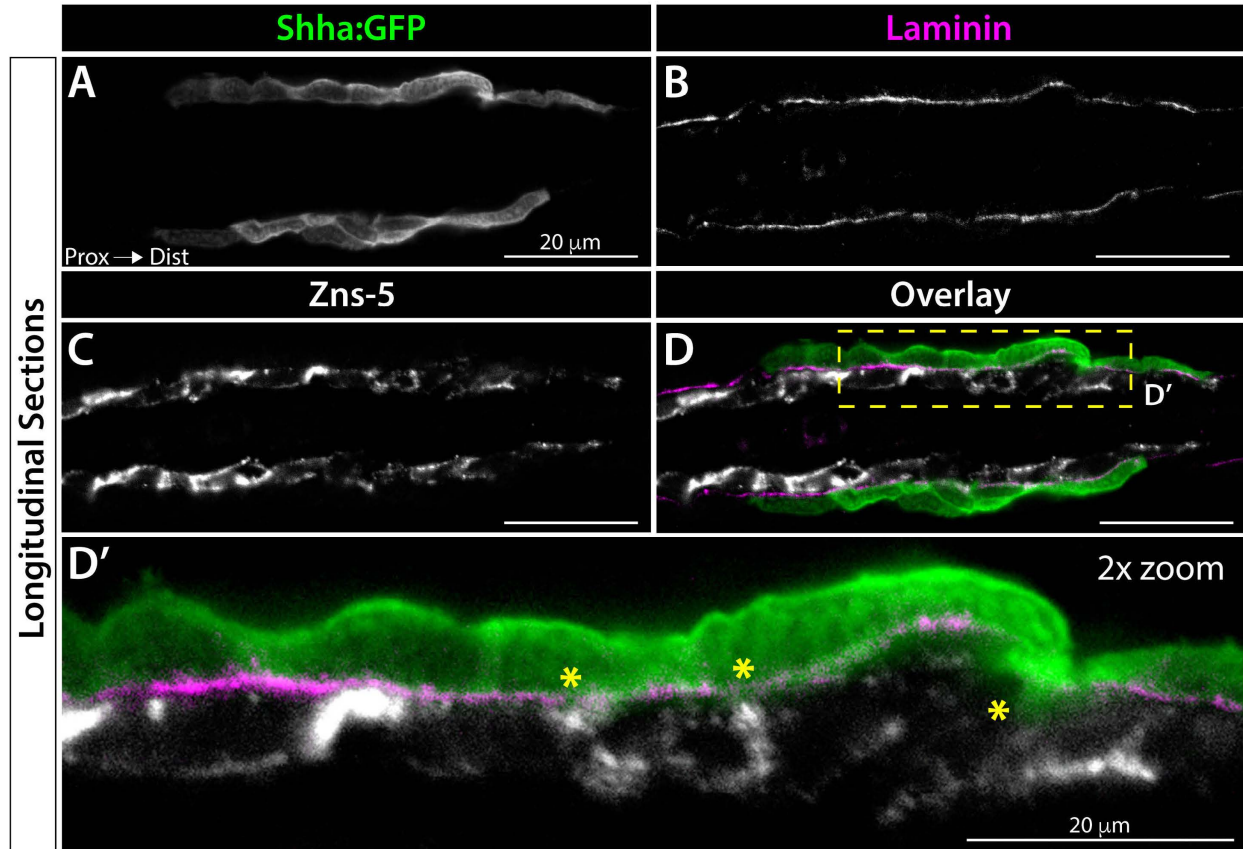

**Figure 5 Supplement 1. Shha+ bEps are tightly associated with pObs in distal regions of incomplete basement membrane assembly.**



**Figure 5 Supplement 1. Shha+ bEps are tightly associated with pObs in distal regions of incomplete basement membrane assembly.**

(A-D) Confocal images of the distal ray regions from immunostained longitudinal caudal fin sections of 32 dpf *shha:GFP* fish. GFP-expressing basal epidermal cells (bEps; green) and Zns-5-marked osteoblasts (white) are separated by a Laminin-defined basement membrane (BM; magenta). (D') 2x magnification of the yellow dashed box region in the (D) overlay. Asterisks mark areas where Laminin signal is less dense, indicating an incompletely assembled BM, and GFP and Zns-5 partially overlap (D'). Scale bars are 20  $\mu\text{m}$ .

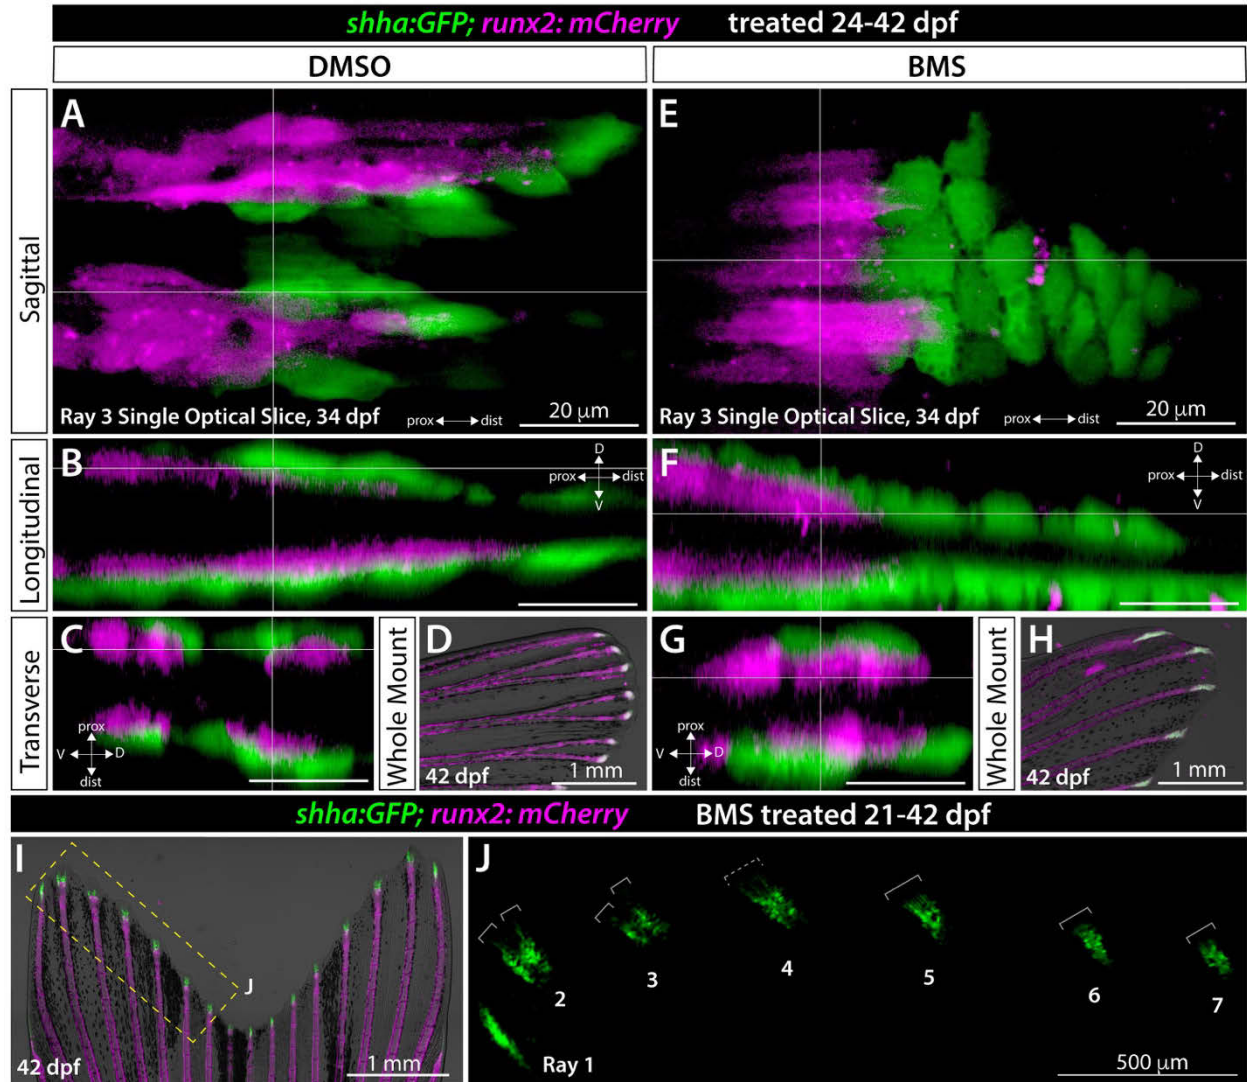

**Figure 5 Supplement 2. Shh/Smo signaling does not influence Shh+ bEps and pOb juxtaposition.**

**Figure 5 Supplement 2. Shh/Smo signaling does not influence Shh+ bEps and pOb juxtaposition.**

(A-J) Confocal or widefield fluorescence caudal fin images from *shha:GFP;runx2:mCherry* fish treated with DMSO (control) or 1.25  $\mu$ M BMS-833923 (BMS) starting at 24 dpf ( $n=8$  per group). (A-C, E-G) Single optical slices or equivalent 3D-reconstructed views of 34 dpf mid-treatment fish, imaged concurrently with active ray branching morphogenesis. *shha:GFP*<sup>+</sup> basal epidermal cells (bEps; green; A) are closely associated with *runx2:mCherry*-expressing progenitor osteoblasts (pObs; magenta). BMS-treated fish (E-G) maintain close Shh+ bEp and Runx2+ pOb contacts while lacking clear *shha:GFP* domain-splitting ( $n=4$  per group). (D, H, I, J) Caudal fin images of *shha:GFP;runx2:mCherry* fish continued on drug treatment until 42 dpf ( $n=4$  per group). (D, H, I) Widefield fluorescence and brightfield overlay caudal fin images. Unlike DMSO controls (D), BMS-treated fish do not develop branched rays, confirming drug efficacy (H). (I, J) Fin of a 21-42 dpf BMS-treated fish. The yellow dashed box indicates the GFP-alone magnified panel in (J). *shha:GFP* domains are variably split (two grey brackets, rays 2, 3), partially split (dashed grey bracket, ray 4) or unsplit (one grey bracket, rays 5-7). Scale bars are 20  $\mu$ m (A-C, E-G), 1 mm (G, H, I) and 500  $\mu$ m (J).

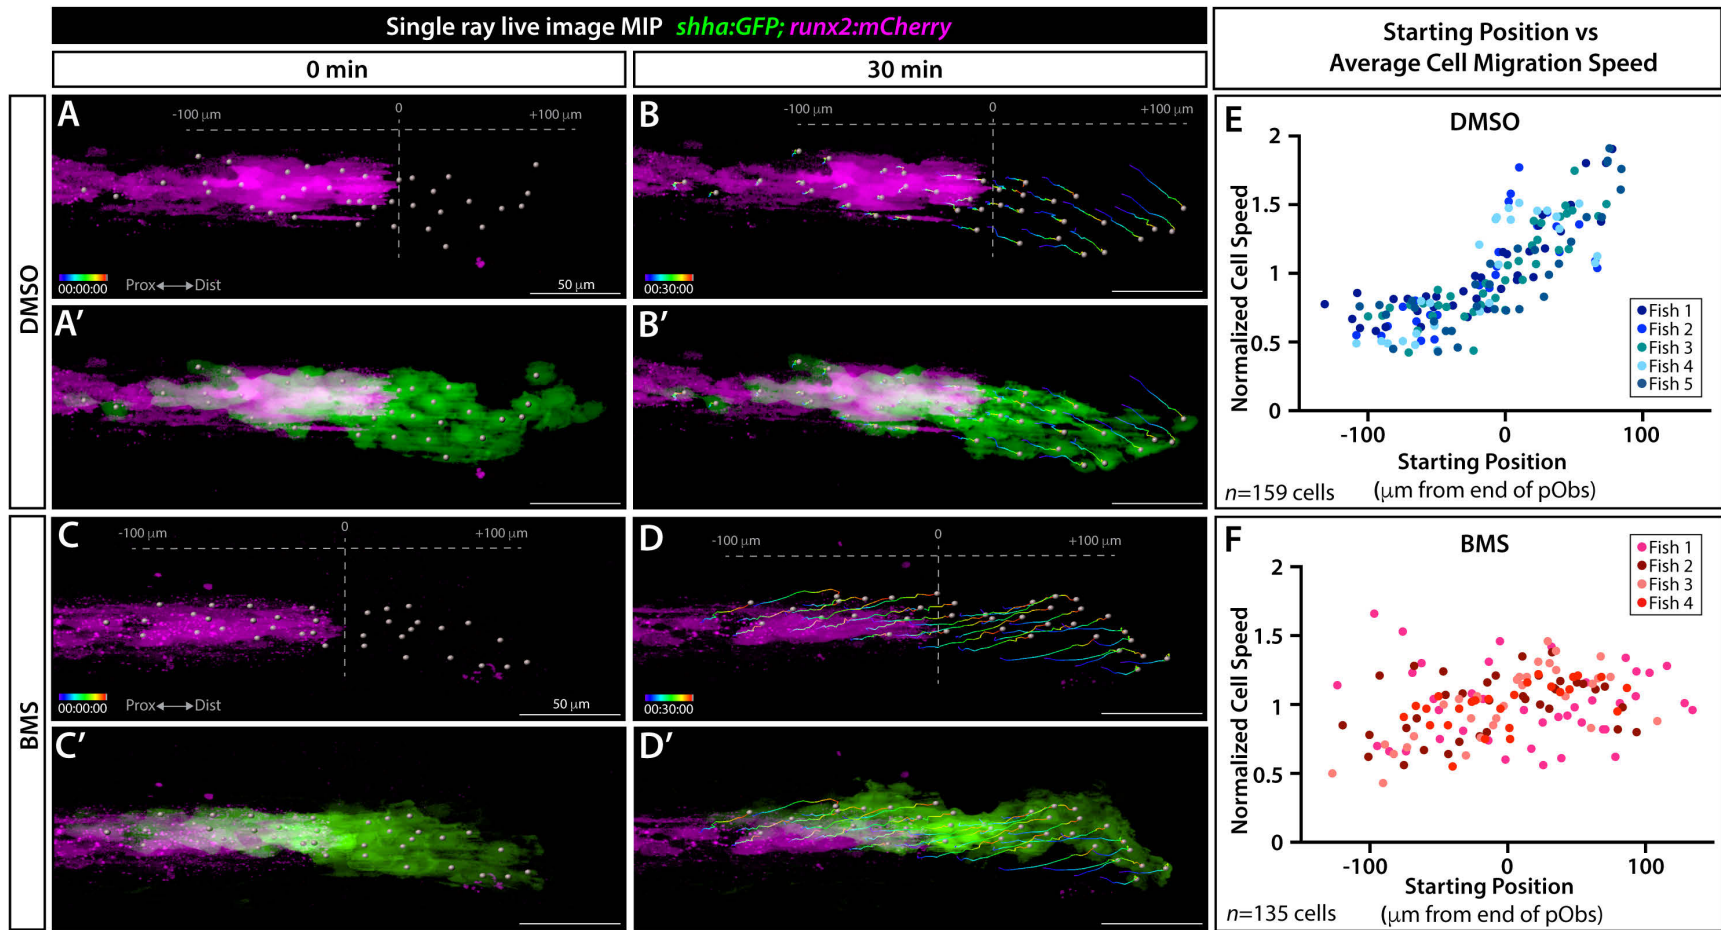

Figure 6. Shh/Smo signaling slows collective migration of *shha:GFP*<sup>+</sup> basal epidermal cells associated with pObs.

**Figure 6. Shh/Smo signaling slows collective migration of *shha*-expressing basal epidermal cells associated with pObs.**

(A-D') Frames from a time lapse movie showing dorsal ray 3 of the caudal fin from live mounted 24 dpf *shha:GFP;runx2:mCherry* fish treated with DMSO or BMS-833923 (BMS) for 24 hours prior to imaging. Images are maximum intensity projections (MIP) and show the start (0 min; A, A', C, C') and end (30 min; B, B', D, D') points. The Imaris-generated colored tracks show the progressive displacement of individual *shha:GFP+* bEps (green). Grey spheres show the starting or final positions of all tracked bEps. Grey dashed vertical lines in (A, B, C, D) indicate the distal most Runx2+ pOb (magenta), defined as position "0". (E, F) Scatterplot graphs showing the average speed of individual bEps, considering their net X-displacement and normalized to all scored cells of the given fish, relative to starting position for DMSO- (159 individual cells from five fish) and BMS-exposed fish (135 cells from four fish). Dot colors correspond to cells from a given fish. Scale bars are 50  $\mu$ m.

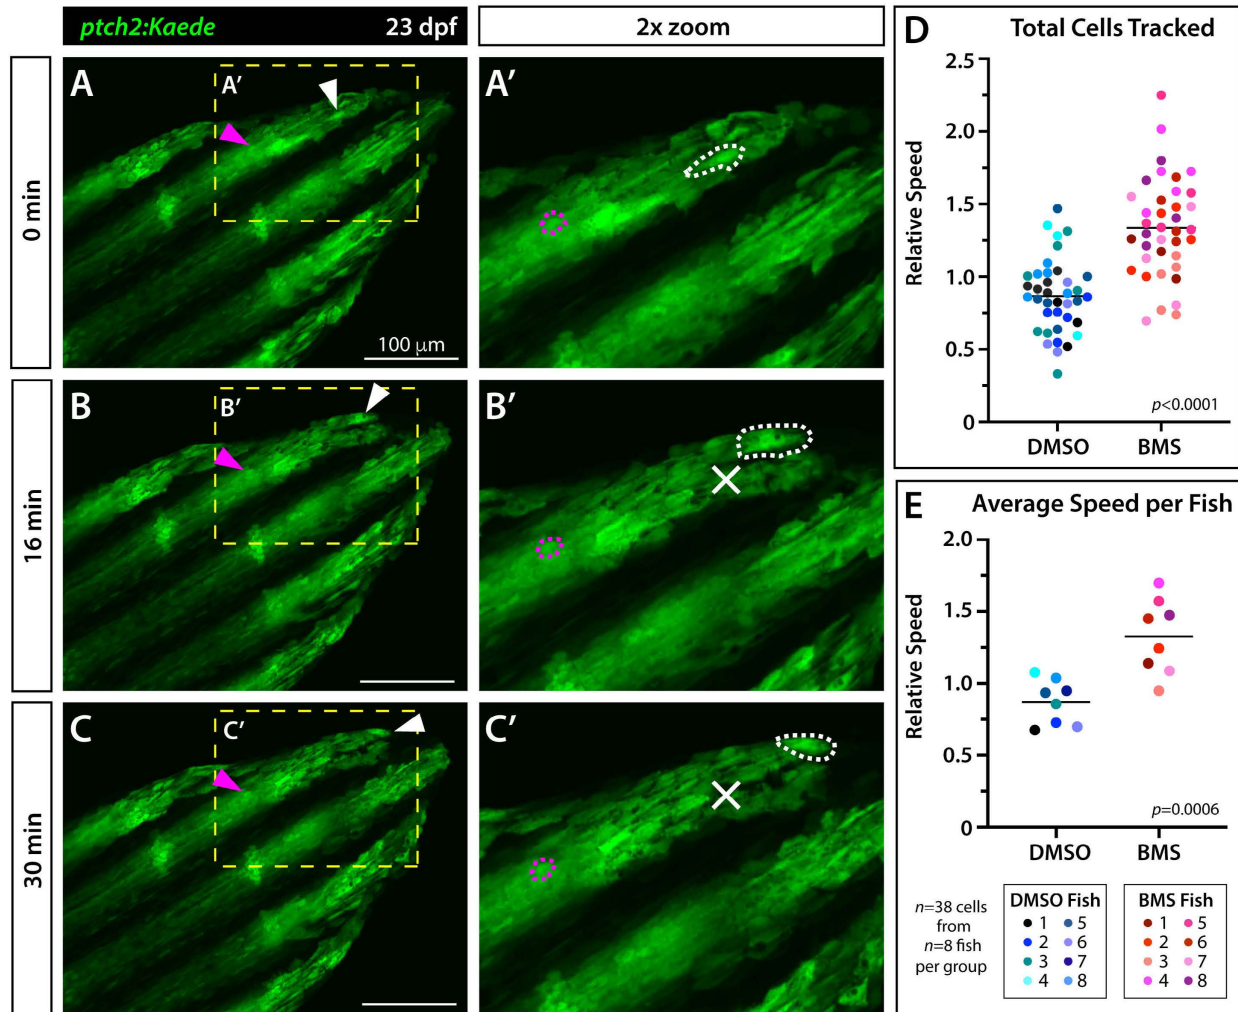

**Figure 6 Supplement 1. Shh/Smo signaling restrains the distal migration of basal epidermal cells.**

### **Figure 6 Supplement 1. Shh/Smo signaling restrains the distal migration of basal epidermal cells.**

(A-C) Still frames from 30 minute time lapse movies capturing basal epidermal (bEp) distal migration in a caudal fin of a live mounted 23 dpf *ptch2:Kaede* fish. The fish was DMSO-treated as a control group member for quantitative studies. Maximum intensity projections (MIPs) of a fin's dorsal lobe are shown at 0 minutes (A, start position), 16 minutes (B, halfway through video), and 30 minutes (C, end position). White and magenta arrowheads indicate a *ptch2:Kaede*<sup>+</sup> bEp and pOb, respectively. Yellow dashed boxes mark the 3x magnified distal ray region in (A'-C'). The representative bEp (white) and pOb (magenta) are outlined with dashed lines. The white Xs in (B', C') indicates the bEps' starting position at 0 minutes. Scale bars are 100  $\mu$ m. (D) Scatterplot graph showing average cell migration speeds (arbitrary relative units) of individual *ptch2:Kaede*<sup>+</sup> bEps from fish treated with DMSO or BMS-833923 (BMS) for 24 hours and then imaged over 30 minutes. bEps of BMS-treated fish migrate faster than DMSO controls ( $p < 0.0001$ , Student's t-test). (E) Graph showing average cell migration rate by individual fish (as indicated by different colors) in BMS-treated fish are significantly faster ( $p < 0.0006$ , Student's t-test).  $n=3$  to 6 cells per fish with 8 fish per treatment for a total of 38 tracked cells per group. Colors represent single bEps from the same animal.

### **Figure 6 Movie 1.**

Time lapse movie of the dorsal lobe of the caudal fin of a live-mounted 23 dpf *ptch2:Kaede* fish treated with DMSO (control group) for 24 hours prior to imaging. Widefield fluorescence images were collected every 2 minutes over a 30 minute period. Still images and data analysis are in Figure 6 Supplement 1.

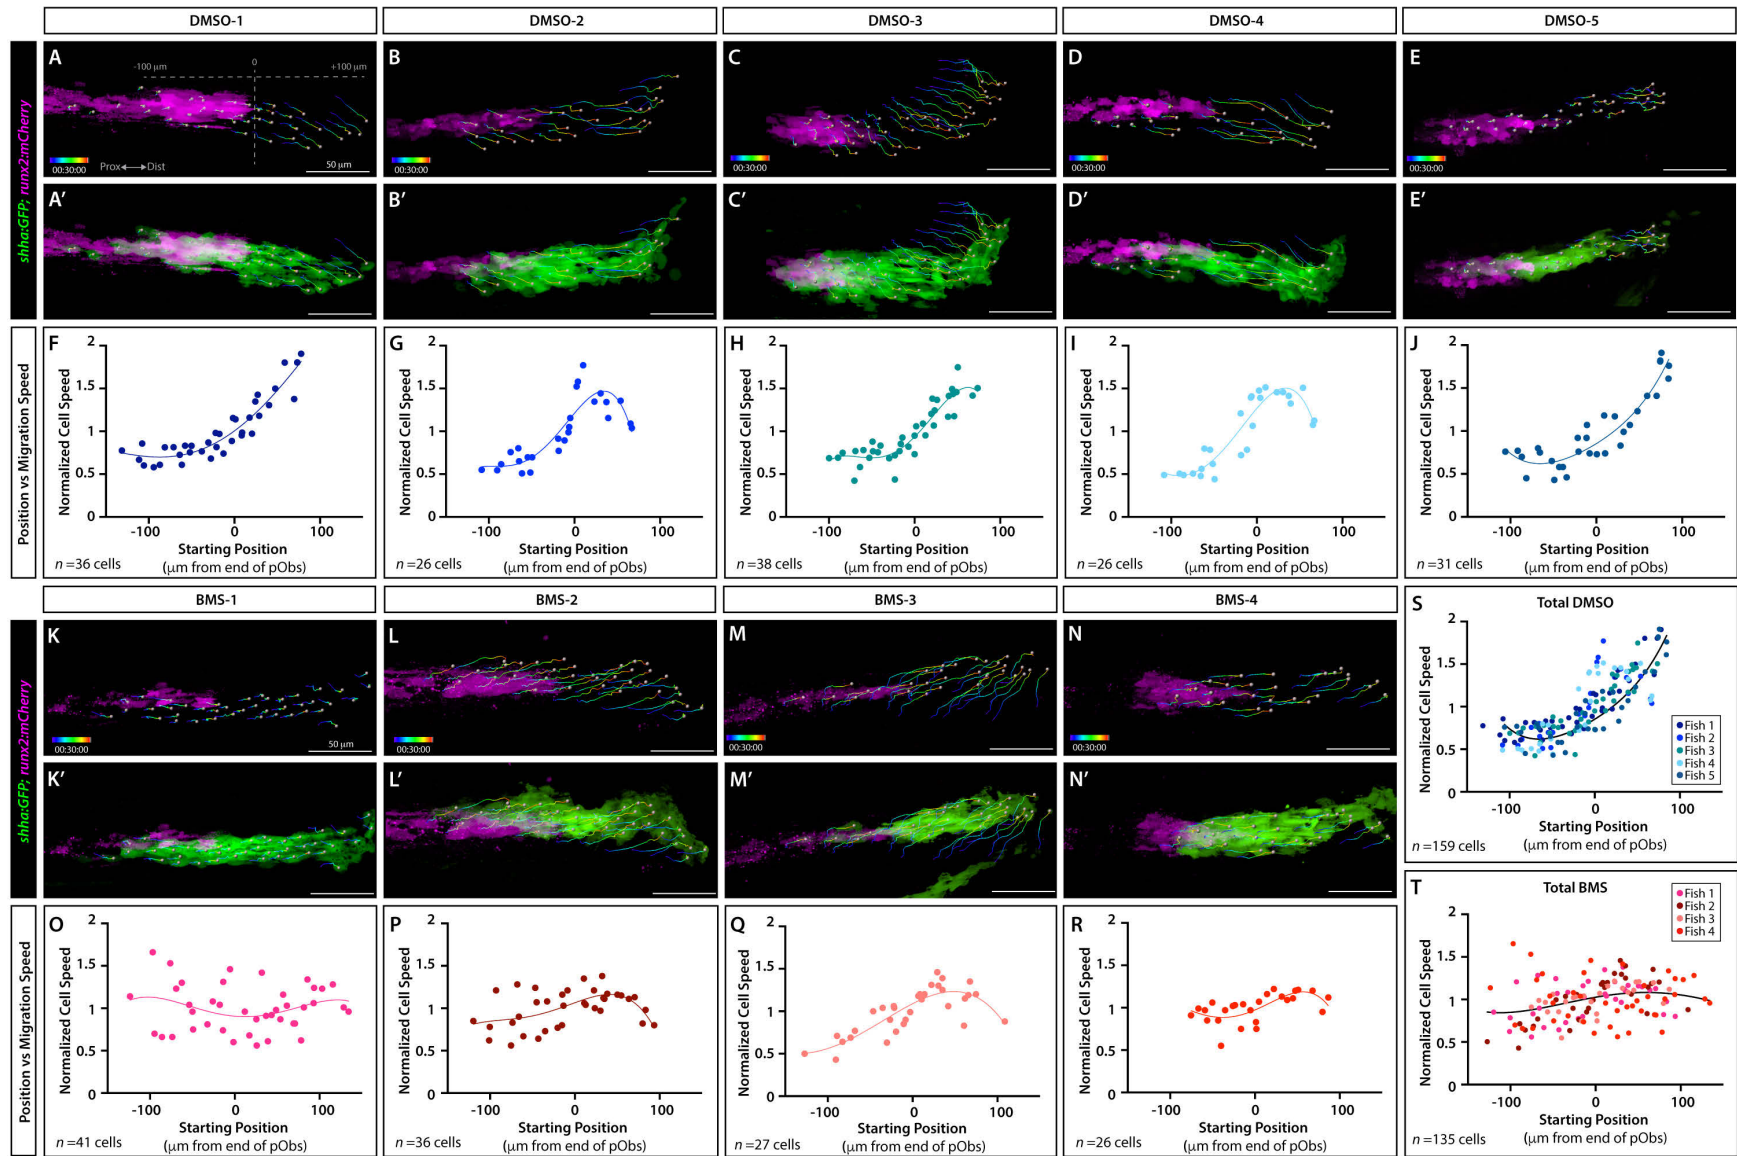

Figure 6 Supplement 2. Position- and Shh/Smo-dependent *shha:GFP*<sup>+</sup> bEp migration rates of individual fish.



### **Figure 6 Supplement 2. Position- and Shh/Smo-dependent *shha:GFP*+ bEp migration rates of individual fish.**

Expanded data from Figure 6. (A-E', K-N') Maximum intensity projections of the final 30 minute frame of time lapse-imaged *shha:GFP;runx2:mCherry* fish (21-24 dpf) treated with DMSO ( $n=5$ ) or BMS-833923 (BMS;  $n=4$ ) for 24 hours. Panels show *runx2:mCherry* progenitor osteoblasts (pObs) only (A-E, K-N; magenta) or both pObs and *shha:GFP*+ basal epidermal cells (A'-E', K'-N'; bEps; green; ). Grey spheres mark semi-automatically tracked bEps with their cell displacement over 30 minutes indicated by multicolor tracks. (F-J, O-T) Average speed vs. starting position scatterplot graphs for each fish. Data points represent individual cell speeds. Non-parametric best-fit curves provide a visual guide. (S, T) Summary graphs reproduced from Figure 6 show combined data with added overall trends. Scale bars are 50  $\mu\text{m}$ .

### **Figure 6 Movie 2.**

Time lapse movie of caudal fin dorsal lobes of representative live-mounted *shha:GFP;runx2:mCherry* fish treated with DMSO (upper panel) or BMS (lower panel) for 24 hours prior to imaging. Shh+ bEps in green and Runx2+ pObs in magenta were imaged by fluorescence confocal microscopy. Multicolor lines indicate cell migration tracks for individual Shh+ bEps (marked by grey spheres) over time. Images were acquired every 2 minutes for 30 minutes. Still images and data analysis are in Figure 6.
